# Supplementary material
Source: PubMed Central journal article supplement (PMC3316658)
Supplement: supp_111.131540_FileS1.pdf [file supp_111.131540_FileS1.pdf]

1 **File S1. Markov Chain Monte Carlo Implementation Strategy for Ante-BayesA and Ante-**  
 2 **BayesB and Supplementary Tables and Figures.**

3 **Joint Posterior Density of All Unknown Parameters:** In order to conduct MCMC, it is  
 4 necessary to first specify the joint posterior density of all unknown parameters (SORENSEN and  
 5 GIANOLA 2002). To do this, we interchangeably reparameterize the joint density of the data  $\mathbf{y}$   
 6 and the random SNP effects, using  $\mathbf{g}$  for ante-BayesA and  $\boldsymbol{\delta}$  for ante-BayesB in order to exploit  
 7 algorithmic efficiencies that are unique to either model. For instance with ante-BayesA, we  
 8 write

$$9 \quad p(\mathbf{y}, \mathbf{g} | \boldsymbol{\beta}, \mathbf{u}, \boldsymbol{\sigma}_{\delta}, \mathbf{t}, \sigma_e^2) = p(\mathbf{y} | \boldsymbol{\beta}, \mathbf{u}, \mathbf{g}, \sigma_e^2) p(\mathbf{g} | \boldsymbol{\sigma}_{\delta}, \mathbf{t}) \quad [\text{A1}]$$

10 Note the component  $p(\mathbf{y} | \boldsymbol{\beta}, \mathbf{u}, \mathbf{g}, \sigma_e^2) = N(\mathbf{X}\boldsymbol{\beta} + \mathbf{Z}\mathbf{g} + \mathbf{W}\mathbf{u}, \mathbf{I}\sigma_e^2)$  is based on Equation [1]

11 whereas  $\mathbf{g} \sim p(\mathbf{g} | \boldsymbol{\sigma}_{\delta}, \mathbf{t}) = N(\mathbf{0}, \mathbf{G})$  with  $\mathbf{G} = (\mathbf{I} - \mathbf{T})^{-1} \boldsymbol{\Delta} (\mathbf{I} - \mathbf{T})^{-1'}$  are defined by elements in

12  $\boldsymbol{\sigma}_{\delta} = [\sigma_{\delta_1}^2 \quad \sigma_{\delta_2}^2 \quad \sigma_{\delta_3}^2 \quad \dots \quad \sigma_{\delta_m}^2]$  specified along the diagonal of  $\boldsymbol{\Delta}$ , and by  $\mathbf{t} = [t_{2,1}, t_{3,2}, \dots, t_{m,m-1}]'$

13 specified just below the diagonal elements in  $\mathbf{T}$  as previously indicated. For ante-BayesB, we  
 14 reparameterize [A1] differently:

$$15 \quad p(\mathbf{y}, \boldsymbol{\delta} | \boldsymbol{\beta}, \mathbf{u}, \boldsymbol{\sigma}_{\delta}, \mathbf{t}, \sigma_e^2) = p(\mathbf{y} | \boldsymbol{\beta}, \boldsymbol{\delta}, \mathbf{t}, \sigma_e^2) p(\boldsymbol{\delta} | \boldsymbol{\sigma}_{\delta}) \quad [\text{A2}]$$

16 recognizing that  $\boldsymbol{\delta} = (\mathbf{I} - \mathbf{T})\mathbf{g}$  such that [A2] represents a linear transformation of [A1]. That is,

17 the first component of [A2] is based on  $p(\mathbf{y} | \boldsymbol{\beta}, \boldsymbol{\delta}, \mathbf{t}, \sigma_e^2) = N(\mathbf{X}\boldsymbol{\beta} + \mathbf{Z}(\mathbf{I} - \mathbf{T})^{-1} \boldsymbol{\delta} + \mathbf{W}\mathbf{u}, \mathbf{I}\sigma_e^2)$

18 whereas  $p(\boldsymbol{\delta} | \boldsymbol{\sigma}_{\delta}) = \prod_{j=1}^m N(0, \sigma_{\delta_j}^2)$ . We'll subsequently represent [A1] and [A2] together as

1  $p(\mathbf{y}, \mathbf{g}(\boldsymbol{\delta}) | \boldsymbol{\beta}, \mathbf{u}, \boldsymbol{\sigma}_\delta, \mathbf{t}, \sigma_e^2, \mu_t, \sigma_t^2)$  to recognize the interchangeability between  $\mathbf{g}$  and  $\boldsymbol{\delta}$  when  
 2 conditioning on  $\mathbf{t}$ . The joint posterior density of all unknown parameters can be written as  
 3 products of specifications provided previously:

$$\begin{aligned}
 & p(\boldsymbol{\beta}, \mathbf{g}, \mathbf{u}, \sigma_e^2, \boldsymbol{\sigma}_\delta, \mathbf{t}, \mu_t, \sigma_t^2, \nu_\delta, s_\delta^2 | \mathbf{y}) \propto \\
 & p(\mathbf{y}, \mathbf{g}(\boldsymbol{\delta}) | \boldsymbol{\beta}, \mathbf{u}, \boldsymbol{\sigma}_\delta, \mathbf{t}, \sigma_e^2, \mu_t, \sigma_t^2) p(\boldsymbol{\beta}) \left( \prod_{j=2}^m p(t_{j,j-1} | \mu_t, \sigma_t^2) \right) \\
 & \left( \prod_{j=1}^m p(\sigma_{\delta_j}^2 | \nu_\delta, s_\delta^2, \pi_\delta) \right) p(\sigma_u^2 | \nu_u, s_u^2), p(\sigma_e^2 | \nu_e, s_e^2) p(\nu_\delta) \\
 & p(s_\delta^2 | \alpha_s, \beta_s) p(\mu_t | \mu_{t0}, s_{t0}^2) p(\sigma_t^2 | \nu_t, s_t^2) p(\pi_\delta | \alpha_\pi, \beta_\pi)
 \end{aligned} \tag{A3}$$

5 From the paper,  $p(\boldsymbol{\beta}) = N(\boldsymbol{\beta}, \mathbf{V}_\beta)$ ,  $p(t_{j,j-1} | \mu_t, \sigma_t^2) = N(\mu_t, \sigma_t^2)$ ,  $p(\sigma_u^2 | \nu_u, s_u^2) = \chi^{-2}(\nu_u, \nu_u s_u^2)$ ,  
 6  $p(\sigma_e^2 | \nu_e, s_e^2) = \chi^{-2}(\nu_e, \nu_e s_e^2)$ ,  $p(s_\delta^2 | \alpha_s, \beta_s) = \text{Gamma}(\alpha_s, \beta_s)$ ,  $p(\mu_t | \mu_{t0}, s_{t0}^2) = N(\mu_{t0}, s_{t0}^2)$ ,  
 7  $p(\sigma_t^2 | \nu_t, s_t^2) = \chi^{-2}(\nu_t, \nu_t s_t^2)$ , and  $p(\pi_\delta | \alpha_\pi, \beta_\pi) = \text{Beta}(\alpha_\pi, \beta_\pi)$ . Furthermore,  $p(\sigma_{\delta_j}^2 | \nu_\delta, s_\delta^2, \pi_\delta)$  is a  
 8 mixture analogous to Equation [2] for ante-BayesB whereas  $p(\sigma_{\delta_j}^2 | \nu_\delta, s_\delta^2, \pi_\delta = 1) = \chi^{-2}(\nu_\delta, \nu_\delta s_\delta^2)$  for  
 9 ante-BayesA as described in the paper. For some parameters, we subsequently derive and  
 10 present FCD separately for ante-BayesA ( $\pi_\delta = 1$ ) from ante-BayesB ( $\pi_\delta < 1$ ) as some MCMC  
 11 sampling strategies appear to be simpler or more computationally efficient for one or the other  
 12 model.  
 13 Now MCMC requires random draws from the full conditional densities of each unknown  
 14 parameter (or blocks thereof) conditional on all other parameters and the data (SORENSEN and  
 15 GIANOLA 2002). These full conditional densities are provided below for various classes of these  
 16 unknown parameters.

1 **Sampling All Fixed and Random Effects in Ante-BayesA:** Write  $\boldsymbol{\theta} = [\boldsymbol{\beta}' \ \mathbf{g}' \ \mathbf{u}']'$  as the  
 2  $(p+m+q)$  vector of fixed and random effects,  $\mathbf{Q} = [\mathbf{X}: \mathbf{Z}: \mathbf{W}]$  as the  $n \times (p+m+q)$  overall  
 3 model incidence matrix with  $\boldsymbol{\Sigma}^{-} = \text{diag}(\mathbf{V}_{\boldsymbol{\beta}}^{-1} \ \mathbf{G}^{-1} \ \mathbf{A}^{-1}\sigma_u^{-2})$  as a block diagonal matrix with the  
 4 corresponding listed components as the various blocks. It can be readily demonstrated  
 5 (SORENSEN and GIANOLA 2002) that the FCD of  $\boldsymbol{\theta}$  is

$$6 \quad \boldsymbol{\theta} | \mathbf{y}, ELSE \sim N(\hat{\boldsymbol{\theta}}, \mathbf{C}) \quad [A4]$$

7 where *ELSE* denotes all other parameters in [A3] other than  $\boldsymbol{\theta}$  and

$$8 \quad \hat{\boldsymbol{\theta}} = \mathbf{CQ}'\mathbf{y} + [\boldsymbol{\beta}_0' \ \mathbf{V}_{\boldsymbol{\beta}}^{-1} \ \mathbf{0}_{1 \times (m+q)}]'$$
 for  $\mathbf{C} = (\mathbf{Q}'\mathbf{Q} + \boldsymbol{\Sigma}^{-})^{-1} \sigma_e^2$ . Note that with a typical “flat” prior for

9  $\boldsymbol{\beta}$  is defined by  $\mathbf{V}_{\boldsymbol{\beta}}^{-1} = \mathbf{0}$  such that  $\hat{\boldsymbol{\theta}} = \mathbf{CQ}'\mathbf{y}$ . Also, note that univariate or multivariate block

10 FCD subsets of  $\boldsymbol{\theta}$  could also be partitioned and sampled using [A4] based on results from Wang

11 and Gianola(1994) The structure of  $\mathbf{G}^{-1} = \{G^{jj'}\}$  contained within  $\boldsymbol{\Sigma}^{-}$  is a simple tridiagonal

12 matrix: using Zimmerman and Nunez-Anton (2010 pg 52), the diagonal elements are

$$13 \quad G^{jj} = \sigma_{\delta_j}^{-2} + t_{j+1,j}^2 \sigma_{\delta_{j+1}}^{-2} \text{ for } j = 1, 2, \dots, m-1 \text{ with } G^{mm} = \sigma_{\delta_m}^{-2} \text{ whereas the elements adjacent to the}$$

$$14 \quad \text{diagonal are } G^{j,j+1} = G^{j+1,j} = -t_{j+1,j} \sigma_{\delta_{j+1}}^{-2}.$$

15 **Sampling marker-specific variances in AnteBayesA:** Consider now the FCD for  $\sigma_{\delta_j}^2$ ,

16  $j=1, 2, \dots, m$ :

$$17 \quad p(\sigma_{\delta_j}^2 | \mathbf{y}, ELSE) \propto p(\mathbf{g} | t_{21}, t_{32}, \dots, t_{m,m-1}, \sigma_{\delta_1}^2, \sigma_{\delta_2}^2, \sigma_{\delta_3}^2, \dots, \sigma_{\delta_m}^2) p(\sigma_{\delta_j}^2 | \nu_{\delta}, s_{\delta}^2) \quad [A5]$$

18 We use Chan and Jeliaskov (2009, pg 461) to simplify the first component of [A5] as follows:

$$\begin{aligned}
& p(\mathbf{g} | t_{21}, t_{32}, \dots, t_{G,G-1}, \sigma_{\delta_1}^2, \sigma_{\delta_2}^2, \sigma_{\delta_3}^2, \dots, \sigma_{\delta_G}^2) \\
1 \quad & \propto |\mathbf{G}^{-1}|^{1/2} \exp\left(-\frac{1}{2} \mathbf{g}' \mathbf{G}^{-1} \mathbf{g}\right) = |(\mathbf{I} - \mathbf{T})' \Delta^{-1} (\mathbf{I} - \mathbf{T})|^{1/2} \exp\left(-\frac{1}{2} \mathbf{g}' (\mathbf{I} - \mathbf{T})' \Delta^{-1} (\mathbf{I} - \mathbf{T}) \mathbf{g}\right) \quad [\text{A6}] \\
& \propto |\Delta^{-1}|^{1/2} \exp\left(-\frac{1}{2} \boldsymbol{\delta}' \Delta^{-1} \boldsymbol{\delta}\right) \propto \prod_{j=1}^G (\sigma_{\delta_j}^2)^{-1/2} \exp\left(-\frac{1}{2} \frac{\delta_j^2}{\sigma_{\delta_j}^2}\right)
\end{aligned}$$

2 Using the component in [A6] pertaining to  $\sigma_{\delta_j}^2$  in [A5] and  $p(\sigma_{\delta_j}^2 | \nu_{\delta}, s_{\delta}^2) \propto \sigma_{\delta_j}^2^{-\left(\frac{\nu_{\delta}+1}{2}\right)} e^{-\frac{\nu_{\delta} s_{\delta}^2}{2\sigma_{\delta_j}^2}}$  then

$$\begin{aligned}
3 \quad & p(\sigma_{\delta_j}^2 | \mathbf{y}, ELSE) \propto (\sigma_{\delta_j}^2)^{-1/2} \exp\left(-\frac{1}{2} \frac{\delta_j^2}{\sigma_{\delta_j}^2}\right) \frac{\left(\frac{\nu_{\delta} s_{\delta}^2}{2}\right)^{\frac{\nu_{\delta}}{2}}}{\Gamma\left(\frac{\nu_{\delta}}{2}\right)} \sigma_{\delta_j}^2^{-\left(\frac{\nu_{\delta}+1}{2}\right)} e^{-\frac{\nu_{\delta} s_{\delta}^2}{2\sigma_{\delta_j}^2}} \quad [\text{A7}] \\
& \propto (\sigma_{\delta_j}^2)^{-\left(\frac{\nu_{\delta}+1}{2}+1\right)} \exp\left(-\frac{1}{2} \frac{(\delta_j^2 + \nu_{\delta} s_{\delta}^2)}{\sigma_{\delta_j}^2}\right)
\end{aligned}$$

4 i.e.  $p(\sigma_{\delta_j}^2 | \mathbf{y}, ELSE) = \chi^{-2}(\nu_{\delta} + 1, \delta_j^2 + \nu_{\delta} s_{\delta}^2)$ . As a sidenote, elements of  $\boldsymbol{\delta}$  can be recursively  
5 derived from  $\mathbf{g}$ :

$$6 \quad \boldsymbol{\delta} = (\mathbf{I} - \mathbf{T}) \mathbf{g} = \begin{bmatrix} 1 & 0 & \dots & 0 & 0 \\ -t_{21} & 1 & \dots & 0 & 0 \\ 0 & -t_{32} & & 0 & 0 \\ \vdots & & \ddots & 1 & 0 \\ 0 & 0 & & -t_{m,m-1} & 1 \end{bmatrix} \begin{bmatrix} g_1 \\ g_2 \\ g_3 \\ \vdots \\ g_m \end{bmatrix} = \begin{bmatrix} g_1 \\ g_2 - t_{21}g_1 \\ g_3 - t_{32}g_2 \\ \vdots \\ g_m - t_{m,m-1}g_{m-1} \end{bmatrix} \quad [\text{A8}]$$

7 **Sampling fixed and random effects other than SNP effects in Ante-BayesB.** Here we deem it  
8 computationally tractable to sample the rest of the location parameters separately from  $\mathbf{g}$ . We  
9 again use Equation [A4] except that now we define  $\boldsymbol{\theta} = [\boldsymbol{\beta}' \ \mathbf{u}']'$  as a  $(p+q) \times 1$  vector of fixed and  
10 random polygenic effects with  $\mathbf{Q} = [\mathbf{X}; \mathbf{W}]$  being the corresponding  $n \times (p+q)$  submodel  
11 incidence matrix and  $\boldsymbol{\Sigma}^- = \text{diag}(\mathbf{0}_{p \times p} \ \mathbf{A}^{-1} \sigma_u^{-2})$  being the corresponding block diagonal matrix.  
12 We then sample using Equation [A4] and  $\hat{\boldsymbol{\theta}} = \mathbf{CQ}'(\mathbf{y} - \mathbf{Zg}) + [\boldsymbol{\beta}_0' \ \mathbf{V}_{\beta}^{-1} \ \mathbf{0}_{1 \times q}]'$  for  
13  $\mathbf{C} = (\mathbf{Q}'\mathbf{Q} + \boldsymbol{\Sigma}^-)^{-1} \sigma_e^2$ .

1 **Sampling random SNP effects and variances in Ante-BayesB:** We consider the collapsed  
 2 sampling strategy (Liu 1994) for jointly sampling  $\sigma_{\delta_j}^2$  and  $\delta_j$  as previously adapted for Bayes B  
 3 in Meuwissen et al (2001). Consider the previously described mixture prior on the conditional  
 4 variances

$$5 \quad p\left(\sigma_{\delta_j}^2 \mid \nu_{\delta}, s_{\delta}^2, \pi_{\delta}\right) = \begin{cases} 0 & \text{with probability } \pi_{\delta} \\ \chi^{-2}\left(\nu_{\delta}, \nu_{\delta} s_{\delta}^2\right) & \text{with probability } \mathbf{1}-\pi_{\delta} \end{cases} \quad [\text{A9}]$$

6 We jointly sample  $\sigma_{\delta_j}^2$  and  $\delta_j$  from  $p\left(\sigma_{\delta_j}^2, \delta_j \mid ELSE, \mathbf{y}\right)$ , by sampling first from  
 7  $p\left(\sigma_{\delta_j}^2 \mid \mathbf{y}, ELSE \text{ except } \delta_j\right)$  and then from  $p\left(\delta_j \mid ELSE, \mathbf{y}\right)$ . The first component of [A2] implies  
 8 the following linear model:

$$9 \quad \mathbf{y} = \mathbf{X}\boldsymbol{\beta} + \mathbf{H}\boldsymbol{\delta} + \mathbf{W}\mathbf{u} + \mathbf{e} \quad [\text{A10}]$$

10 where  $\mathbf{H} = \mathbf{Z}(\mathbf{I} - \mathbf{T})^{-1}$ . Let's further partition  $\mathbf{H}$  into the  $j$ th column,  $\mathbf{h}_j$ , and other remaining  
 11 columns  $\mathbf{H}_{-j}$ ; similarly, we represent  $\boldsymbol{\delta}_{-j}$  as all elements of  $\boldsymbol{\delta}$  other than  $\delta_j$ . Then we further  
 12 rewrite [A10] as follows:

$$13 \quad \mathbf{y} = \mathbf{X}\boldsymbol{\beta} + \mathbf{H}_{-j}\boldsymbol{\delta}_{-j} + \mathbf{h}_j\delta_j + \mathbf{W}\mathbf{u} + \mathbf{e} \quad [\text{A11}]$$

14 It can be readily demonstrated, following similar developments for BayesB provided by  
 15 Meuwissen et al. (2001), that:

$$16 \quad \begin{aligned} p\left(\sigma_{\delta_j}^2 \mid \mathbf{y}, ELSE \text{ except } \delta_j\right) &= \int_{\delta_j} p\left(\sigma_{\delta_j}^2, \delta_j \mid \mathbf{y}, ELSE\right) \\ &\propto \int_{\delta_j} p\left(\mathbf{y} \mid \boldsymbol{\beta}, \boldsymbol{\delta}, \mathbf{u}, \mathbf{t}, \sigma_e^2\right) p\left(\delta_j \mid \sigma_{\delta_j}^2\right) p\left(\sigma_{\delta_j}^2 \mid \nu_{\delta}, s_{\delta}^2, \pi\right) d\delta_j \\ &\propto p\left(\sigma_{\delta_j}^2 \mid \nu_{\delta}, s_{\delta}^2, \pi\right) \int_{\delta_j} \exp\left(-\frac{1}{2\sigma_e^2}\left(\mathbf{y}_j^* - \mathbf{h}_j\delta_j\right)' \left(\mathbf{y}_j^* - \mathbf{h}_j\delta_j\right)\right) \exp\left(-\frac{1}{2\sigma_{\delta_j}^2} \delta_j^2\right) d\delta_j \\ &\propto p\left(\sigma_{\delta_j}^2 \mid \nu_{\delta}, s_{\delta}^2, \pi\right) \left|\mathbf{V}_j\right|^{-1/2} \exp\left(-\frac{1}{2}\mathbf{y}_j^* \mathbf{V}_j^{-1} \mathbf{y}_j^*\right) \end{aligned} \quad [\text{A12}]$$

17 where  $\mathbf{y}_j^* = \mathbf{y} - \mathbf{X}\boldsymbol{\beta} - \mathbf{H}_{-j}\boldsymbol{\delta}_{-j} - \mathbf{W}\mathbf{u}$  and  $\mathbf{V}_j = \mathbf{h}_j\mathbf{h}_j'\sigma_{\delta_j}^2 + \mathbf{I}\sigma_e^2$ .

18 Since [A12] is not a recognizable distributional form, a Metropolis Hastings step is required.  
 19 We adapt the independence chains implementation (CHIB and GREENBERG 1995) as also adapted  
 20 by Meuwissen et al. (2001) using the prior  $p\left(\sigma_{\delta_j}^2 \mid \nu_{\delta}, s_{\delta}^2, \pi_{\delta}\right)$  as the candidate density. That is,

1 at MCMC cycle  $[k]$ , one samples a candidate, say,  $\sigma_{\delta_j}^{2[*]}$ , from  $p(\sigma_{\delta_j}^2 | \nu_{\delta}, s_{\delta}^2, \pi_{\delta})$  conditioned  
 2 upon the updated values for  $\nu_{\delta}, s_{\delta}^2$  and  $\pi_{\delta}$ . One accepts  $\sigma_{\delta_{j[k]}}^2 = \sigma_{\delta_{j^*}}^2$  as the value for in cycle  $[k]$   
 3 with probability based on the Metropolis-Hastings acceptance ratio  $q(\sigma_{\delta_{j[k-1]}}^2 \rightarrow \sigma_{\delta_{j^*}}^2)$ :

$$4 \quad q(\sigma_{\delta_{j[k-1]}}^2 \rightarrow \sigma_{\delta_{j^*}}^2) = \begin{cases} \min \left( \frac{p(\sigma_{\delta_{j^*}}^2 | \mathbf{y}, \text{ELSE except } \delta_j) p(\sigma_{\delta_{j[k-1]}}^2 | \nu_{\delta}, s_{\delta}^2, \pi)}{p(\sigma_{\delta_{j[k-1]}}^2 | \mathbf{y}, \text{ELSE except } \delta_j) p(\sigma_{\delta_{j^*}}^2 | \nu_{\delta}, s_{\delta}^2, \pi)}, 1 \right); & [\text{A13}] \\ 1, \text{otherwise} \end{cases}$$

5 If the proposal  $\sigma_{\delta_{j^*}}^2$  is rejected, then set  $\sigma_{\delta_{j[k]}}^2 = \sigma_{\delta_{j[k-1]}}^2$ ; i.e., the value of  $\sigma_{\delta_j}^2$  in the previous  
 6 MCMC cycle. It can be demonstrated that using Meuwissen et al. (2001) that [A13] is further  
 7 equal to:

$$8 \quad q(\sigma_{\delta_{j[k-1]}}^2 \rightarrow \sigma_{\delta_{j^*}}^2) = \begin{cases} \min \left( \frac{|\mathbf{V}_j^*|^{-1/2} \exp\left(-\frac{1}{2} \mathbf{y}^* \mathbf{V}_j^{*-1} \mathbf{y}^*\right)}{|\mathbf{V}_j^{[t-1]}|^{-1/2} \exp\left(-\frac{1}{2} \mathbf{y}^* (\mathbf{V}_j^{[t-1]})^{-1} \mathbf{y}^*\right)}, 1 \right) & [\text{A14}] \\ 1, \text{otherwise} \end{cases}$$

9 Note that neither the determinant  $|\mathbf{V}_j|$  nor the inverse  $\mathbf{V}_j^{-1}$  are trivial computations since  $m$  is  
 10 typically large. Adapting a development from Rohan Fernando (personal communication) for  
 11 BayesB, it can be readily shown that [A14] further simplifies:

$$12 \quad q(\sigma_{\delta_{j[k-1]}}^2 \rightarrow \sigma_{\delta_{j^*}}^2) = \begin{cases} \min \left( \frac{\left(v_j^*\right)^{-1/2} \exp\left(-\frac{1}{2} \frac{(\mathbf{h}_j \mathbf{y}_j^*)^2}{v_j^*}\right)}{\left(v_j^{[t+1]}\right)^{-1/2} \exp\left(-\frac{1}{2} \frac{(\mathbf{h}_j \mathbf{y}_j^*)^2}{v_j^{[t+1]}}\right)}, 1 \right) & [\text{A15}] \\ 1, \text{otherwise} \end{cases}$$

14 where  $v_j^* = (\mathbf{h}_j \mathbf{h}_j)^2 \sigma_{\delta_{j^*}}^2 + (\mathbf{h}_j \mathbf{h}_j) \sigma_e^2$  and  $v_j^{[k-1]} = (\mathbf{h}_j \mathbf{h}_j)^2 \sigma_{\delta_{j[k-1]}}^2 + (\mathbf{h}_j \mathbf{h}_j) \sigma_e^2$ . Once  $\sigma_{\delta_j}^2$  is  
 15 sampled, one could immediately draw  $\delta_j$  from  $p(\delta_j | \text{ELSE}, \mathbf{y})$  readily seen to be

$$1 \quad p(\delta_j | ELSE, \mathbf{y}) = N\left(\frac{\mathbf{h}'_j \mathbf{y}_j^*}{\mathbf{h}'_j \mathbf{h}_j + \sigma_{\delta_j}^{-2}}, \frac{\sigma_e^2}{\mathbf{h}'_j \mathbf{h}_j + \sigma_{\delta_j}^{-2}}\right) \quad [A16]$$

2 in order to complete the joint collapsed sampler draw from  $p(\sigma_{\delta_j}^2, \delta_j | ELSE, \mathbf{y})$ . One could  
 3 demonstrate the following backward recursive relationship  $\mathbf{h}_{j-1} = t_{j,j-1} \mathbf{h}_j + \mathbf{z}_{j-1}$ ,  $j = m, m-2, \dots, 2$   
 4 with  $\mathbf{z}_j$  denoting column  $j$  of  $\mathbf{Z}$  and  $\mathbf{h}_m = \mathbf{z}_m$ . Hence for computational tractability, one could use  
 5 this relationship in sampling pairs from  $p(\sigma_{\delta_j}^2, \delta_j | ELSE, \mathbf{y})$  starting with  $j = m$  and working  
 6 recursively backwards to  $j=1$ .

7 **Sampling proportion of SNP markers associated with zero-effects in Ante-BayesB:** The  
 8 FCD of  $\pi_{\delta}$  is based on the following:

$$9 \quad p(\boldsymbol{\pi}_{\delta} | \mathbf{y}, ELSE) \propto \prod_{j=1}^m p(\sigma_{\delta_j}^2 | \mathbf{v}_{\delta}, s_{\delta}^2, \boldsymbol{\pi}_{\delta}) p(\boldsymbol{\pi}_{\delta} | \boldsymbol{\alpha}_{\delta}, \boldsymbol{\beta}_{\delta}) \quad [A17]$$

10 where  $p(\boldsymbol{\pi}_{\delta} | \boldsymbol{\alpha}_{\delta}, \boldsymbol{\beta}_{\delta}) = Beta(\boldsymbol{\alpha}_{\delta}, \boldsymbol{\beta}_{\delta})$ . Let  $m_1 = \sum_{j=1}^m I(\sigma_{\delta_j}^2 = 0)$  denote the number of zero-  
 11 valued elements sampled in  $\boldsymbol{\sigma}_{\delta}$  for a particular MCMC cycle where  $I(\cdot)$  denotes the indicator  
 12 function. Then it can be readily demonstrated that Equation[A17] is simply  
 13  $p(\boldsymbol{\pi}_{\delta} | \mathbf{y}, ELSE) = Beta(\boldsymbol{\alpha}_{\delta} + m_1, \boldsymbol{\beta}_{\delta} + m - m_1)$ .

14

15 **Sampling antedependence parameters and their corresponding hyperparameters:** Consider  
 16 now deriving the joint FCD of  $\mathbf{t} = [t_{2,1}, t_{3,2}, \dots, t_{m,m-1}]'$ :

$$17 \quad p(\mathbf{t} | \mathbf{y}, ELSE) \propto p(\mathbf{g} | t_{2,1}, t_{3,2}, \dots, t_{m,m-1}, \sigma_{\delta_1}^2, \sigma_{\delta_2}^2, \sigma_{\delta_3}^2, \dots, \sigma_{\delta_G}^2) \left( \prod_{j=2}^m p(t_{j,j-1} | \mu_t, \sigma_t^2) \right) \quad [A18]$$

18 Borrowing developments, again from Chan and Jeliakov (2009, pg 462), the first component of  
 19 [A18] can be rewritten as:

$$\begin{aligned}
& p(\mathbf{g} | t_{21}, t_{32}, \dots, t_{m,m-1}, \sigma_{\delta_1}^2, \sigma_{\delta_2}^2, \sigma_{\delta_3}^2, \dots, \sigma_{\delta_m}^2) \\
& \propto |(\mathbf{I} - \mathbf{T})' \mathbf{\Delta}^{-1} (\mathbf{I} - \mathbf{T})|^{1/2} \exp\left(-\frac{1}{2} \mathbf{g}' (\mathbf{I} - \mathbf{T})' \mathbf{\Delta}^{-1} (\mathbf{I} - \mathbf{T}) \mathbf{g}\right) \\
1 \quad & \propto \exp\left(-\frac{1}{2} \frac{(g_2 - t_{21}g_1)^2}{\sigma_{\delta_2}^2}\right) \exp\left(-\frac{1}{2} \frac{(g_3 - t_{32}g_2)^2}{\sigma_{\delta_3}^2}\right) \dots \exp\left(-\frac{1}{2} \frac{(g_m - t_{m,m-1}g_{m-1})^2}{\sigma_{\delta_m}^2}\right) \\
& \propto \exp\left(-\frac{1}{2} (\mathbf{g}_{(-1)} - \mathbf{\Psi} \mathbf{t})' \mathbf{\Delta}_{(-1)}^{-1} (\mathbf{g}_{(-1)} - \mathbf{\Psi} \mathbf{t})\right) \tag{A19}
\end{aligned}$$

2 saving only terms that are functions of  $\mathbf{t}$  with  $\mathbf{\Psi} = \text{diag}(g_1, g_2, \dots, g_{m-1})$  being a diagonal  $m-1 \times$   
3  $m-1$  matrix with the listed elements,  $\mathbf{g}_{(-1)} = [g_2 \ g_3 \ \dots \ g_m]'$ , and  $\mathbf{\Delta}_{(-1)} = \text{diag}(\sigma_{\delta_2}^2, \sigma_{\delta_3}^2, \dots, \sigma_{\delta_m}^2)$   
4 being a diagonal  $m-1 \times m-1$  matrix with the listed elements. Hence, [A18] can be rewritten as  
5 follows:

$$\begin{aligned}
& p(\mathbf{t} | \mathbf{y}, ELSE) \propto p(\mathbf{g}_{(-1)} | \mathbf{t}, \mathbf{\Delta}_{(-1)}) p(\mathbf{t} | \mathbf{1}\mu_t, \mathbf{I}\sigma_t^2) \\
6 \quad & \propto \left( \exp\left(-\frac{1}{2} (\mathbf{g}_{(-1)} - \mathbf{\Psi} \mathbf{t})' \mathbf{\Delta}_{(-1)}^{-1} (\mathbf{g}_{(-1)} - \mathbf{\Psi} \mathbf{t})\right) \right) \exp\left(-\frac{1}{2\sigma_t^2} (\mathbf{t} - \mathbf{1}\mu_t)' (\mathbf{t} - \mathbf{1}\mu_t)\right) \\
& \propto \left( \exp\left(-\frac{1}{2} (\mathbf{t} - \hat{\mathbf{t}})' \mathbf{\Sigma}_t^{-1} (\mathbf{t} - \hat{\mathbf{t}})\right) \right) \tag{A20}
\end{aligned}$$

7 where

$$8 \quad \hat{\mathbf{\Sigma}}_t = (\mathbf{\Psi}' \mathbf{\Delta}_{(-1)}^{-1} \mathbf{\Psi} + \mathbf{I}\sigma_t^{-2})^{-1} \tag{A21}$$

9 and

$$10 \quad \hat{\mathbf{t}} = (\mathbf{\Psi}' \mathbf{\Delta}_{(-1)}^{-1} \mathbf{\Psi} + \mathbf{I}\sigma_t^{-2})^{-1} (\mathbf{\Psi}' \mathbf{\Delta}_{(-1)}^{-1} \mathbf{g}_{(-1)} + \mathbf{1}\sigma_t^{-2} \mu_t) \tag{A22}$$

11 Note that  $\mathbf{\Psi}' \mathbf{\Delta}_{(-1)}^{-1} \mathbf{\Psi} + \mathbf{I}\sigma_t^{-2}$  is diagonal with elements  $(g_j)^2 \sigma_{\delta_{j+1}}^{-2} + \sigma_t^{-2}$ ,  $j = 1, 2, \dots, m-1$ , whereas  
12 element  $j$  of  $\mathbf{\Psi}' \mathbf{\Delta}_{(-1)}^{-1} \mathbf{g}_{(-1)} + \mathbf{1}\sigma_t^{-2} \mu_t$  is  $g_j g_{j+1} \sigma_{\delta_{j+1}}^{-2} + \sigma_t^{-2} \mu_t$ ,  $j = 1, 2, \dots, m-1$ . In other words, the  
13 FCD of  $t_{j+1,j}$  is  $t_{j+1,j} | ELSE, \mathbf{y} \sim N(\hat{t}_{j+1,j}, \hat{\sigma}_{t(j+1,j)}^2)$  where



$$\hat{t}_{j+1,j} = \frac{g_j g_{j+1} \sigma_{\delta_{j+1}}^{-2} + \sigma_t^{-2} \mu_t}{(g_j)^2 \sigma_{\delta_{j+1}}^{-2} + \sigma_t^{-2}} \quad [\text{A23}]$$

and

$$\hat{\sigma}_{t(j+1,j)}^2 = \left( (g_j)^2 \sigma_{\delta_{j+1}}^{-2} + \sigma_t^{-2} \right)^{-1} \quad [\text{A24}]$$

Note further that  $\hat{t}_{j+1,j}$  can be written as a weighted average:

$$\hat{t}_{j+1,j} = \frac{g_j g_{j+1} \sigma_{\delta_{j+1}}^{-2} + \sigma_t^{-2} \mu_t}{\sigma_{\delta_{j+1}}^{-2} (g_j)^2 + \sigma_t^{-2}} = \frac{\sigma_{\delta_{j+1}}^{-2} (g_j)^2}{\sigma_{\delta_{j+1}}^{-2} (g_j)^2 + \sigma_t^{-2}} \frac{g_{j+1}}{g_j} + \frac{\sigma_t^{-2}}{\sigma_{\delta_{j+1}}^{-2} (g_j)^2 + \sigma_t^{-2}} \mu_t \quad [\text{A25}]$$

Now with  $g_j = 0$ , as one might anticipate occasionally with ante-BayesB with markers defined at the beginning of a linkage group,  $\hat{t}_{j+1,j} = \mu_t$  and  $\hat{\sigma}_{t(j+1,j)}^2 = \sigma_t^2$  such that one draws  $t_{j+1,j}$  from its prior density based on updated values of  $\mu_t$  and  $\sigma_t^2$ . For the much more common situation in ante-BayesB (assuming large  $\pi_\delta$ ) where  $g_j \neq 0$  but  $\sigma_{\delta_{j+1}}^2 = 0$ , the FCD of  $t_{j+1,j}$  can be shown to be a point mass on  $\frac{g_{j+1}}{g_j}$ .

With  $p(\mu_t)$  specified to be normal with prior mean  $\mu_{t0}$  and prior variance  $s_{t0}^2$  then Gibbs sampling can be used for the corresponding parameters.

$$p(\mu_t, | \mathbf{y}, \mathbf{ELSE}) = N(\tilde{\mu}_t, \tilde{\sigma}_t^2) \quad [\text{A26}]$$

where

$$\tilde{\mu}_t = \frac{\frac{m-1}{\sigma_t^2} \bar{t} + \frac{1}{s_{t0}^2} \mu_{t0}}{\frac{1}{s_{t0}^2} + \frac{m-1}{\sigma_t^2}} \quad [\text{A27}]$$

for  $\bar{t} = \frac{\sum_{j=1}^m t_{j,j-1}}{m-1}$  and

$$1 \quad \tilde{\sigma}_t^2 = \left( \frac{1}{s_{t0}^2} + \frac{m-1}{\sigma_t^2} \right)^{-1} \quad [\text{A28}]$$

2 The FCD of  $\sigma_t^2$  given that the prior  $p(\sigma_t^2 | \nu_t, s_t^2)$  is scaled inverted chi-square with known  
 3 hyperparameters  $\nu_t$  and  $s_t^2$  can be derived as follows:

$$4 \quad \begin{aligned} & p(\sigma_t^2 | \mathbf{y}, ELSE) \\ & \propto \left( \prod_{j=2}^m p(t_{j,j-1} | \mu_t, \sigma_t^2) \right) p(\sigma_t^2 | \nu_t, s_t^2) \\ & \propto \left( (2\pi\sigma_t^2)^{-(m-1)/2} \prod_{j=2}^m \exp\left(-\frac{1}{2\sigma_t^2} \sum_{j=2}^m (t_{j,j-1} - \mu_t)^2\right) \right) \sigma_t^{-2\left(\frac{\nu_t}{2}+1\right)} e^{-\frac{\nu_t s_t^2}{2\sigma_t^2}} \\ & \propto \left( (\sigma_t^2)^{-\left(\frac{\nu_t+m-1}{2}+1\right)} \prod_{j=1}^G \exp\left(-\frac{1}{2\sigma_t^2} \left(\sum_{j=2}^m (t_{j,j-1} - \mu_t)^2 + \nu_t s_t^2\right)\right) \right) \end{aligned} \quad [\text{A29}]$$

5 That is,  $p(\sigma_t^2 | \mathbf{y}, ELSE) = \chi^{-2}\left(m + \nu_t, \sum_{j=2}^m (t_{j,j-1} - \mu_t)^2 + \nu_t s_t^2\right)$ . Note that we advocate the non-  
 6 informative specifications  $\nu_t = -1$  and  $s_t^2 = 0$  in the paper.

7

8 **Sampling the scale parameter for the random SNP effects:** Borrowing results from Yi and  
 9 Xu (2008), the FCD for  $s_\delta^2$  based on the specification of a conjugate prior  $p(s_\delta^2 | \alpha_s, \beta_s) =$

10 Gamma  $(\alpha_s, \beta_s)$  can be written as follows:

$$11 \quad \begin{aligned} & p(s_\delta^2 | \mathbf{y}, ELSE) \propto \left( \prod_{j=1}^m I(\sigma_{\delta_j}^2 > 0) p(\sigma_{\delta_j}^2 | \nu_\delta, s_\delta^2) \right) p(s_\delta^2 | \alpha_s, \beta_s) \\ & = \left( \prod_{j=1}^m I(\sigma_{\delta_j}^2 > 0) \frac{\left(\frac{s_\delta^2 \nu_\delta}{2}\right)^{\frac{\nu_\delta}{2}}}{\Gamma\left(\frac{\nu_\delta}{2}\right)} \sigma_{\delta_j}^{-2\left(\frac{\nu_\delta}{2}+1\right)} e^{-\frac{s_\delta^2 \nu_\delta}{2\sigma_{\delta_j}^2}} \right) \frac{(\beta_s)^{\alpha_s}}{\Gamma(\alpha_s)} (s_\delta^2)^{\alpha_s-1} e^{-\beta_s s_\delta^2} \\ & \propto (s_\delta^2)^{\alpha_s + \frac{m\nu_\delta+1}{2}-1} \exp\left(-s_\delta^2 \left(\frac{\nu_\delta}{2} \sum_{j=1}^m I(\sigma_{\delta_j}^2 > 0) \sigma_{\delta_j}^{-2} + \beta_s\right)\right) \end{aligned} \quad [\text{A30}]$$

1 i.e., a Gamma distribution with parameters  $\alpha_s + \frac{m_1 v_\delta + 1}{2}$  and  $\frac{v_\delta}{2} \sum_{j=1}^m I(\sigma_{\delta_j}^2 > 0) \sigma_{\delta_j}^{-2} + \beta_s$ .

2 **Sampling the degrees of freedom parameter for the random SNP effects:** Simple  
 3 Metropolis updates could be used for sampling  $v_\delta$ . For an arbitrary prior  $p(v_\delta)$ , the  
 4 corresponding FCD is as follows:

$$\begin{aligned}
 p(v_\delta | ELSE) &\propto \left( \prod_{j=1}^m I(\sigma_{\delta_j}^2 > 0) p(\sigma_{\delta_j}^2 | v_\delta, s_\delta^2) \right) p(v_\delta) \\
 &= \left( \prod_{j=1}^m I(\sigma_{\delta_j}^2 > 0) \frac{\left( \frac{v_\delta s_\delta^2}{2} \right)^{\frac{v_\delta}{2}}}{\Gamma\left(\frac{v_\delta}{2}\right)} \sigma_{g_j}^2^{-\left(\frac{v_\delta}{2}+1\right)} e^{-\frac{v_\delta s_\delta^2}{2\sigma_{g_j}^2}} \right) p(v_\delta)
 \end{aligned} \tag{A31}$$

6 Details on how to  $v_\delta$  can be based on a random walk Metropolis Hastings step; we have provided  
 7 details on this in other non-genomic applications involving the sampling of degrees of freedom  
 8 parameters (BELLO *et al.* 2010; KIZILKAYA and TEMPELMAN 2005).

9 **Sampling the residual variance:** Given a specified scaled inverted chi-square prior

10  $p(\sigma_e^2 | \alpha_e, s_e^2) = \chi^{-2}(\alpha_e, \alpha_e s_e^2)$ , the corresponding FCD of  $\sigma_e^2$  can be written as follows:

$$\begin{aligned}
 &p(\sigma_e^2 | \mathbf{y}, ELSE) \\
 &\propto \left( (2\pi\sigma_e^2)^{-n/2} \right) \exp\left( -\frac{1}{2\sigma_e^2} (\mathbf{y} - \mathbf{X}\boldsymbol{\beta} - \mathbf{Z}\mathbf{g} - \mathbf{W}\mathbf{u})' (\mathbf{y} - \mathbf{X}\boldsymbol{\beta} - \mathbf{Z}\mathbf{g} - \mathbf{W}\mathbf{u}) \right) \sigma_e^{-\left(\frac{v_e}{2}+1\right)} e^{-\frac{v_e s_e^2}{2\sigma_e^2}} \\
 &\propto \sigma_e^{-\left(\frac{v_e+n}{2}+1\right)} \exp\left( -\frac{1}{2\sigma_e^2} \left( (\mathbf{y} - \mathbf{X}\boldsymbol{\beta} - \mathbf{Z}\mathbf{g} - \mathbf{W}\mathbf{u})' (\mathbf{y} - \mathbf{X}\boldsymbol{\beta} - \mathbf{Z}\mathbf{g} - \mathbf{W}\mathbf{u}) + v_e s_e^2 \right) \right)
 \end{aligned} \tag{A32}$$

12 In other words, [A32] is  $\chi^{-2}(v_e + n, (\mathbf{y} - \mathbf{X}\boldsymbol{\beta} - \mathbf{Z}\mathbf{g} - \mathbf{W}\mathbf{u})' (\mathbf{y} - \mathbf{X}\boldsymbol{\beta} - \mathbf{Z}\mathbf{g} - \mathbf{W}\mathbf{u}) + v_e s_e^2)$ . Note that we  
 13 advocate the non-informative specifications  $v_e = -1$  and  $s_e^2 = 0$  in the paper.

14

15 **Sampling the polygenic variance:** Given a conjugate scaled inverted-chi square prior

16  $p(\sigma_u^2 | \alpha_u, s_u^2) = \chi^{-2}(\alpha_u, \alpha_u s_u^2)$  The FCD of  $\sigma_e^2$  is classically given as follows:

$$1 \quad p(\sigma_u^2 | \mathbf{y}, \text{ELSE}) \propto (\sigma_u^2)^{-\left(\frac{\nu_u + q}{2} + 1\right)} \exp\left(-\frac{1}{2} \frac{(\mathbf{u}' \mathbf{A}^{-1} \mathbf{u} + \nu_u s_u^2)}{\sigma_u^2}\right) \quad [\text{A33}]$$

2 In other words, [A33] is  $\chi^{-2}(\nu_u + q, \mathbf{u}' \mathbf{A}^{-1} \mathbf{u} + \nu_u s_u^2)$ . Note that we advocate the non-informative  
 3 specifications  $\nu_u = -1$  and  $s_u^2 = 0$  in the paper.

4

5

### References for File S1

- 6 BELLO, N. M., J. P. STEIBEL and R. J. TEMPELMAN, 2010 Hierarchical Bayesian modeling of  
 7 random and residual variance-covariance matrices in mixed effects models. *Biometrical*  
 8 *Journal* **52**: 297-313.
- 9 CHAN, J. C. C., and I. JELIAZKOV, 2009 MCMC Estimation of Restricted Covariance Matrices.  
 10 *Journal of Computational and Graphical Statistics* **18**: 457-480.
- 11 CHIB, S., and E. GREENBERG, 1995 Understanding the Metropolis-Hastings Algorithm. *American*  
 12 *Statistician* **49**: 327-335.
- 13 KIZILKAYA, K., and R. J. TEMPELMAN, 2005 A general approach to mixed effects modeling of  
 14 residual variances in generalized linear mixed models. *Genetics Selection Evolution* **37**:  
 15 31-56.
- 16 LIU, J. S., 1994 The Collapsed Gibbs Sampler in Bayesian Computations with Applications to a  
 17 Gene-Regulation Problem. *Journal of the American Statistical Association* **89**: 958-966.
- 18 MEUWISSEN, T. H. E., B. J. HAYES and M. E. GODDARD, 2001 Prediction of total genetic value  
 19 using genome-wide dense marker maps. *Genetics* **157**: 1819-1829.
- 20 SORENSEN, D., and D. GIANOLA, 2002 *Likelihood, Bayesian, and MCMC methods in quantitative*  
 21 *genetics*. Springer-Verlag, New York.
- 22 WANG, C. S., J. J. RUTLEDGE and D. GIANOLA, 1994 Bayesian-Analysis of Mixed Linear-Models  
 23 Via Gibbs Sampling with an Application to Litter Size in Iberian Pigs. *Genetics Selection*  
 24 *Evolution* **26**: 91-115.
- 25 YI, N., and S. XU, 2008 Bayesian Lasso for quantitative trait loci mapping. *Genetics* **179**: 1045 -  
 26 1055.
- 27 ZIMMERMAN, D. L., and V. A. NUNOZ-ANTON, 2010 *Antedependence Models for Longitudinal*  
 28 *Data*. Chapman and Hall/CRC.

29

30

31

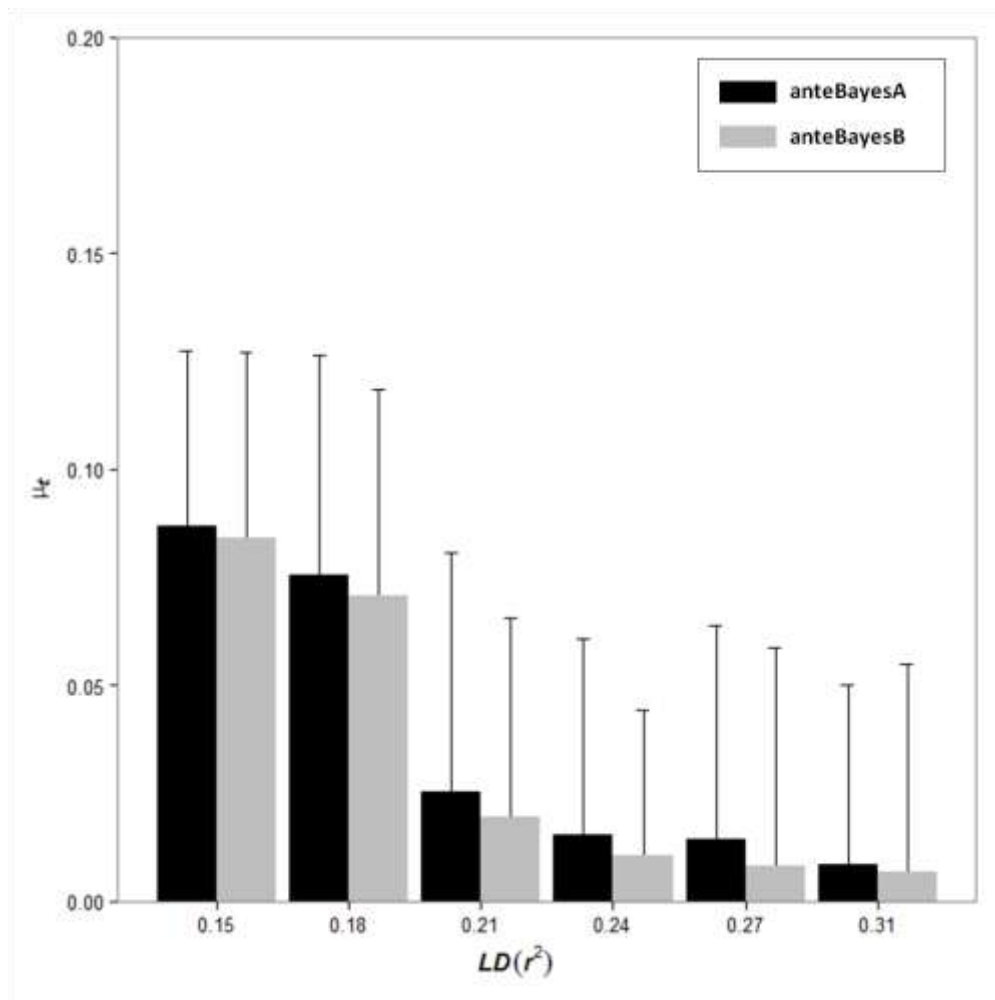

1

2 FIGURE S1. Average posterior means of  $\mu_i$  and empirical standard errors across 20 replicates for each of  
3 six different LD levels using ante-BayesA and ante-BayesB. No significant differences ( $P > .01$ ) were  
4 determined between the competing procedures with each other or from zero at each LD level.

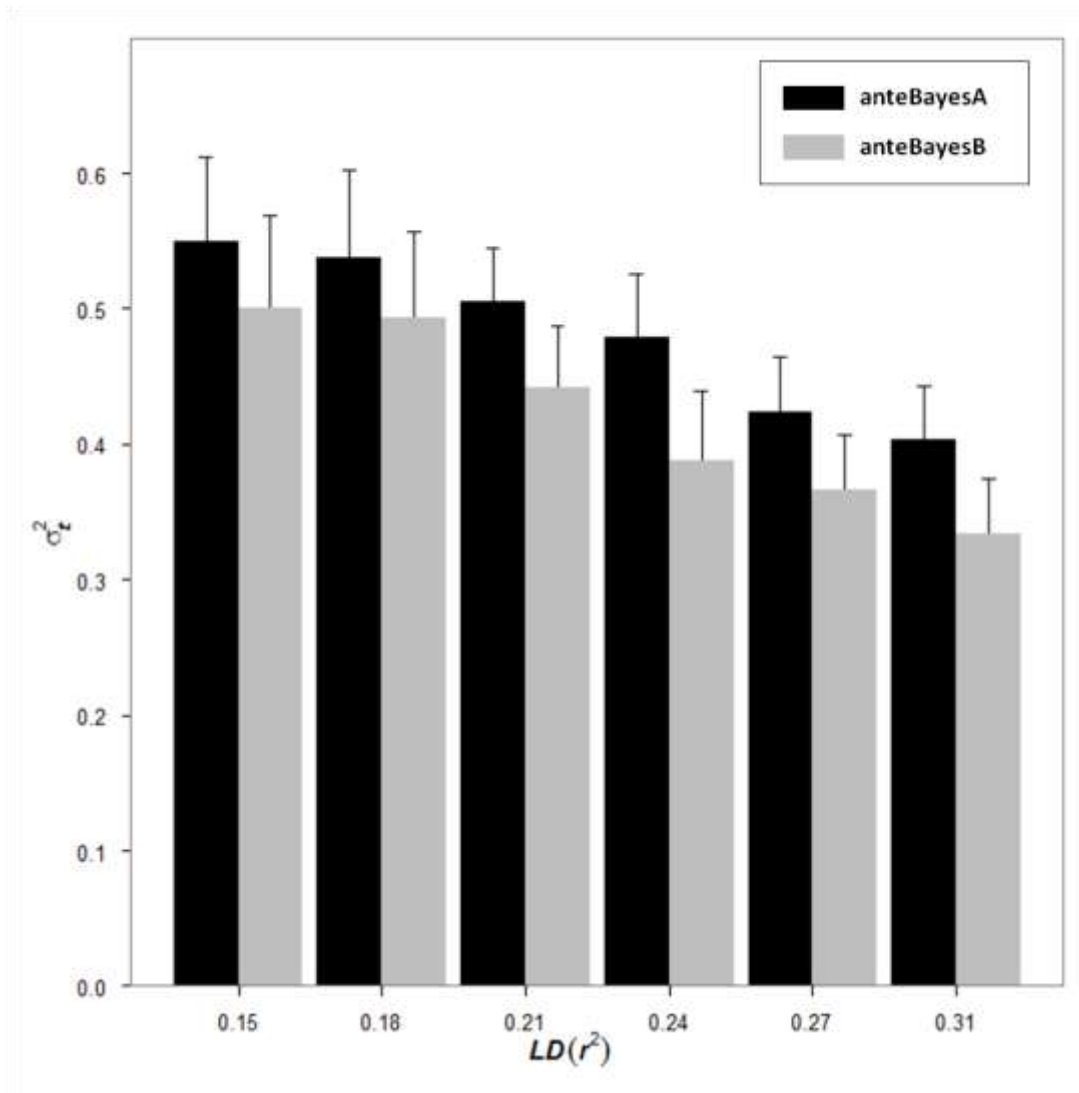

1

2 FIGURE S2. Average posterior means of  $\sigma^2$  and empirical standard errors across 20 replicates for each  
3 of six different LD levels using ante-BayesA and ante-BayesB. No significant differences ( $P > .01$ ) were  
4 determined between the two sets of competing procedures at each LD level.

5

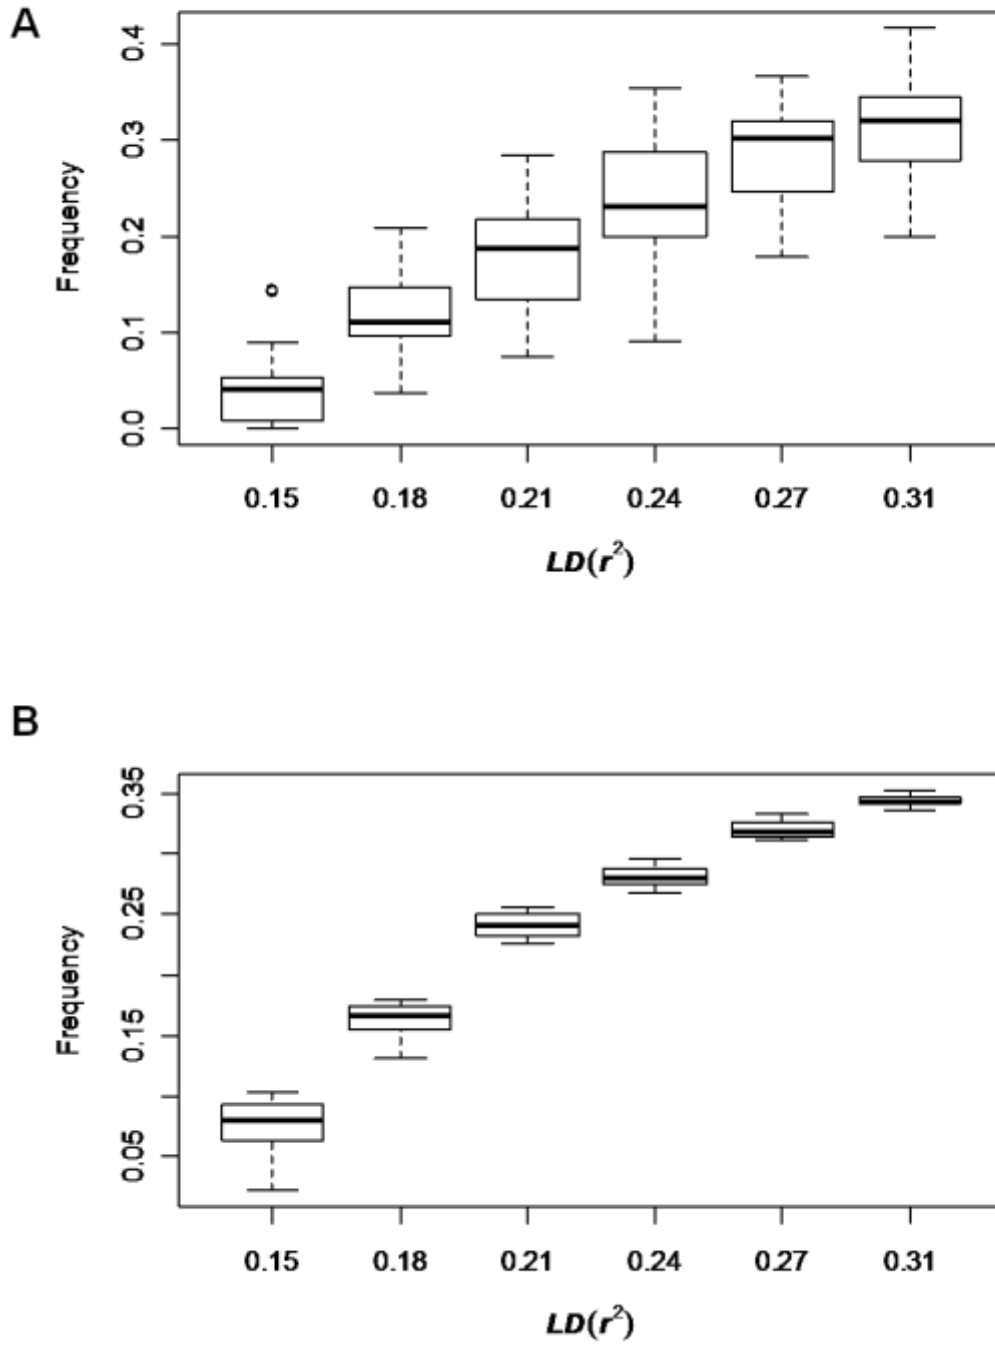

1

2

FIGURE S3: Box-plot of proportions of the absolute posterior means of elements of  $\{t_{j,j-1}\}_{j=2}^m$  divided by their respective

3

posterior standard deviations that exceeded 2 across all 20 replicates for each of six different levels of LD using ante-

4

BayesA (A) and ante-BayesB (B).

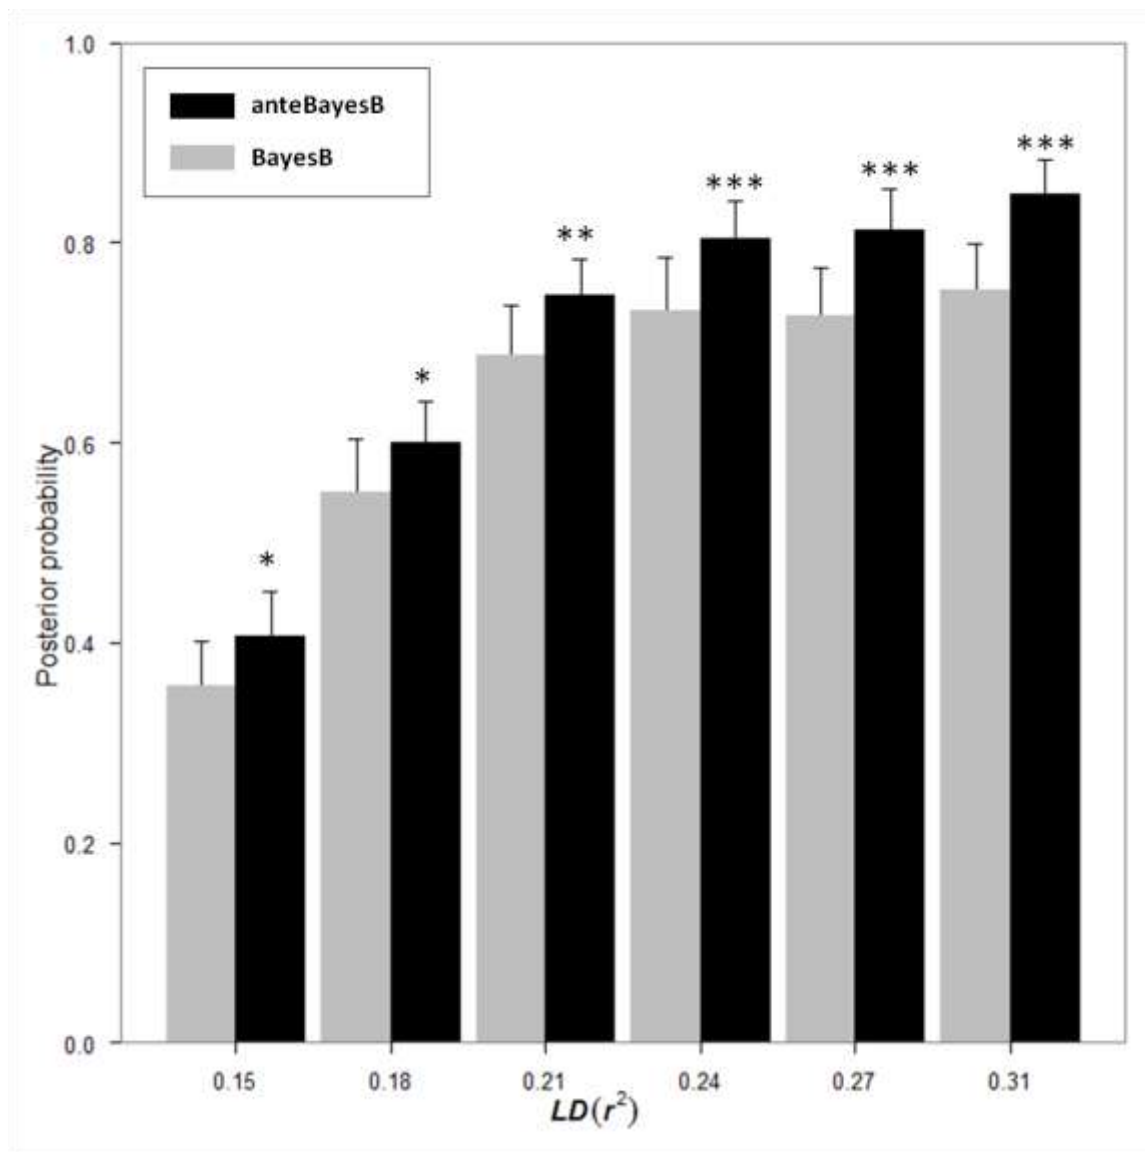

1

2 FIGURE S4. Average posterior probabilities of association for the top QTL within each of 20 replicates using  
3 BayesB and ante-BayesB for each of six different LD levels. LD-specific differences between the two methods  
4 declared significant by \*( $P < 0.01$ ), \*\*( $P < 0.001$ ), or \*\*\*( $P < 0.0001$ ).

5

6



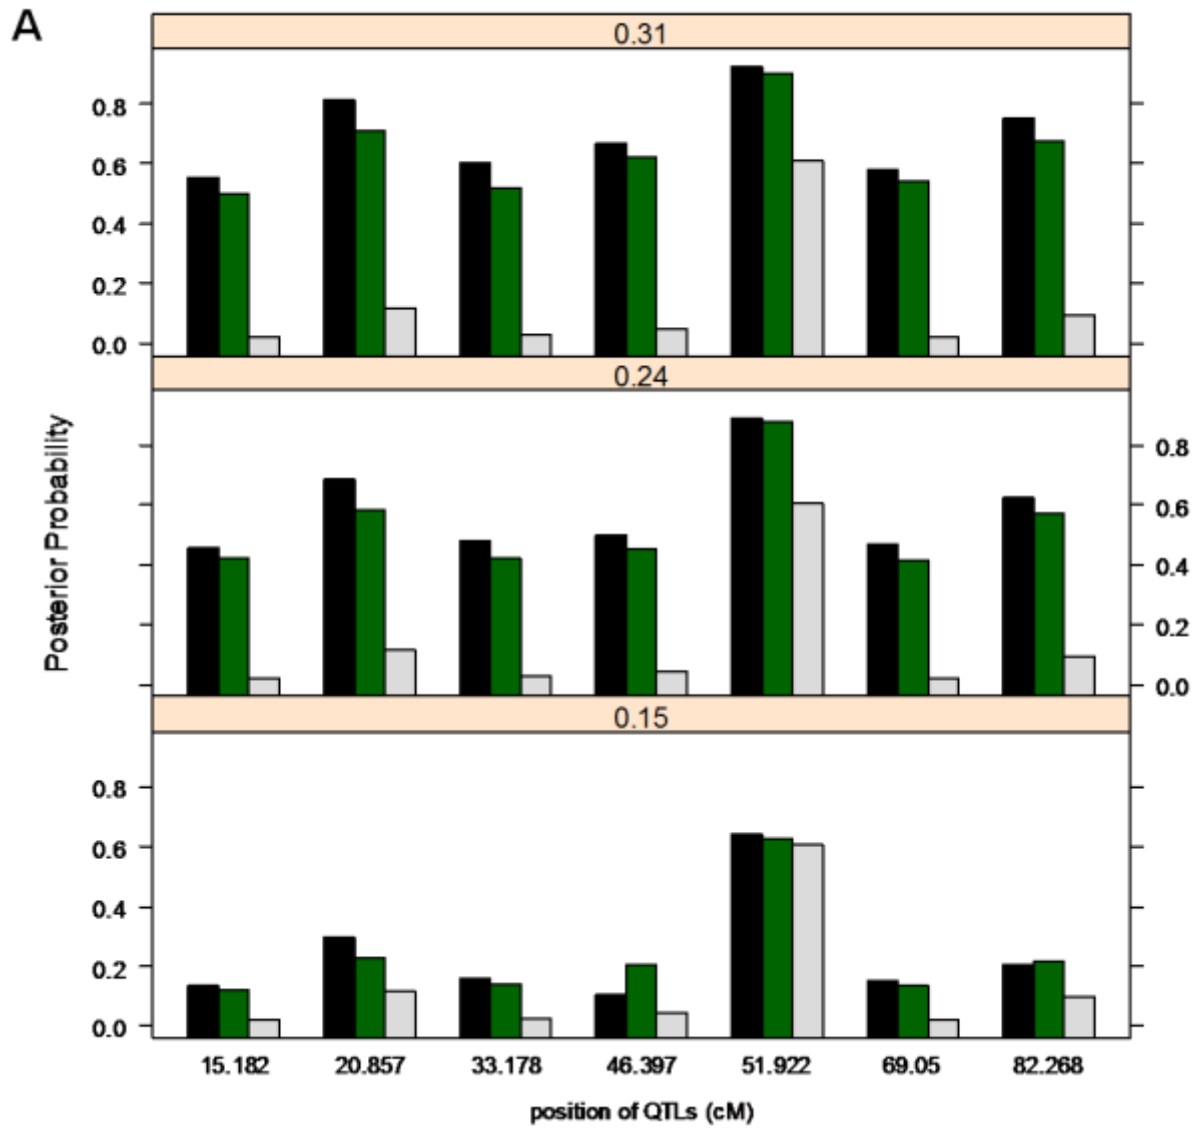

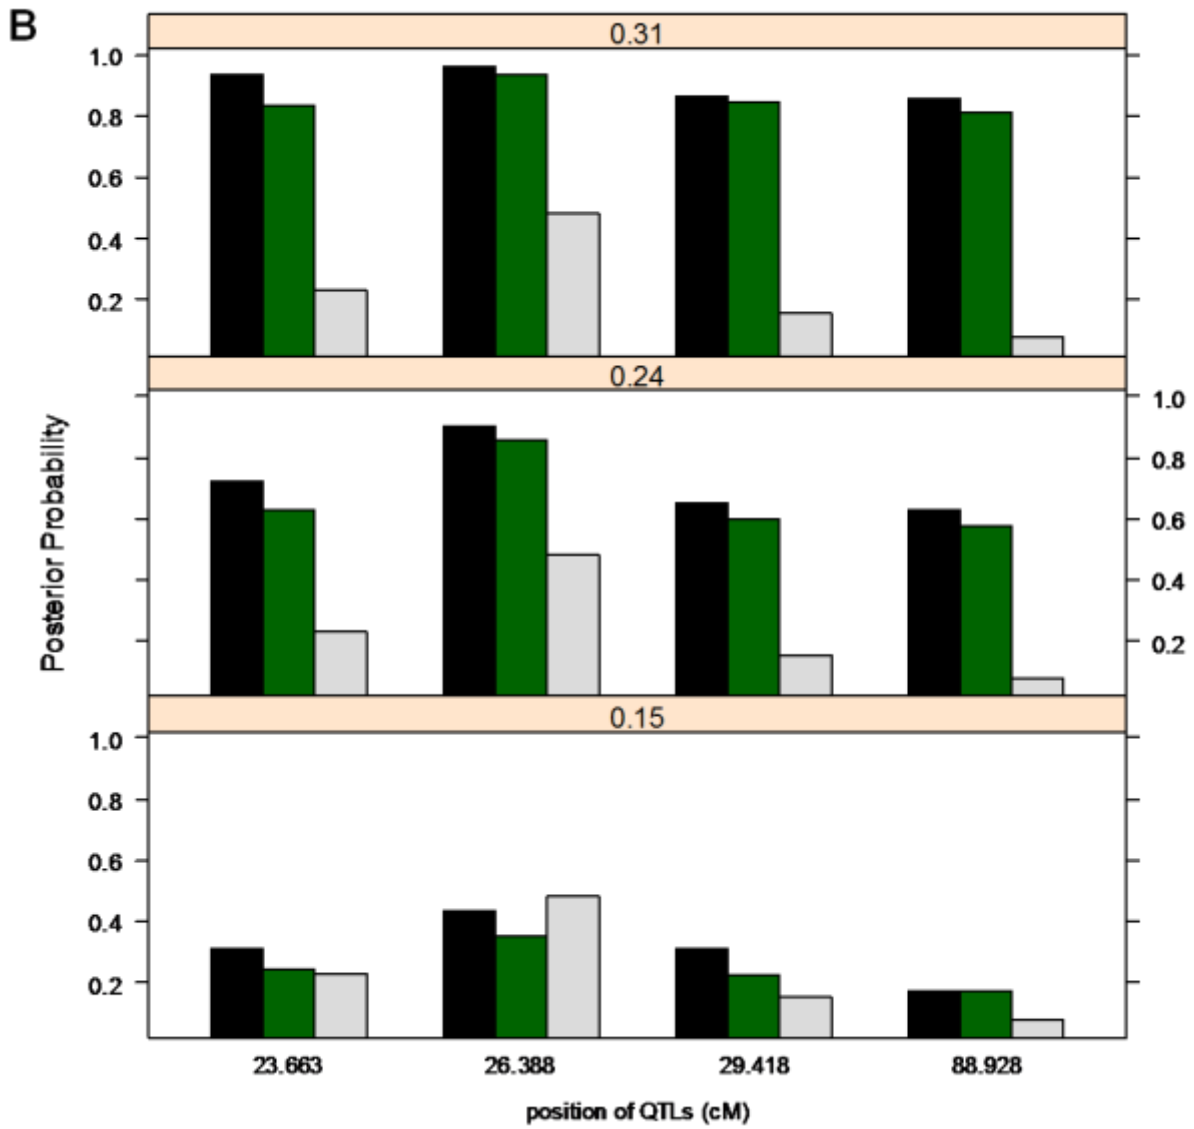

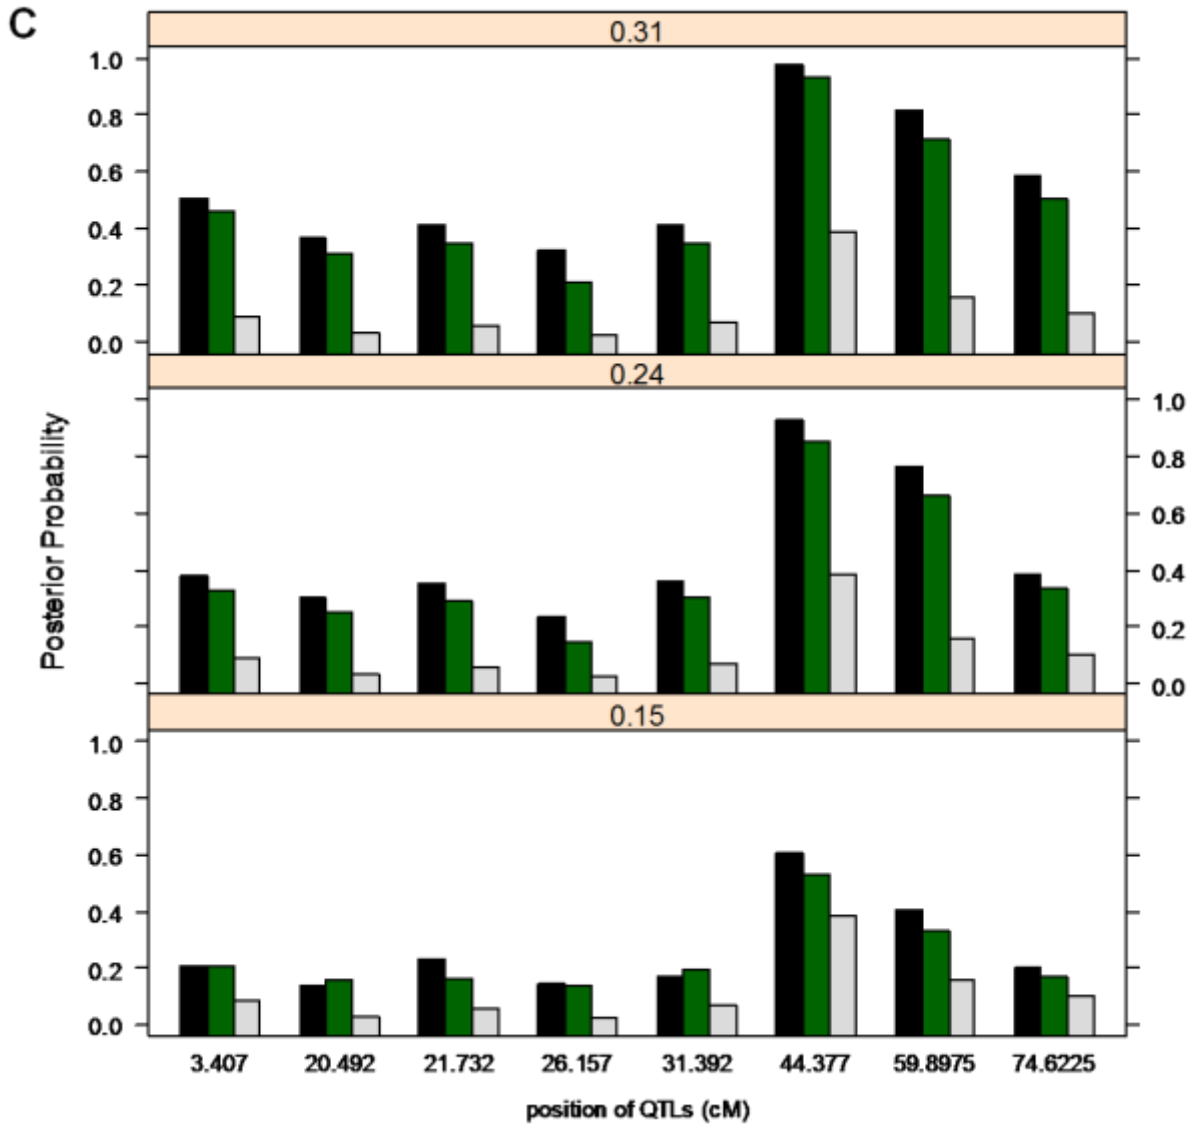

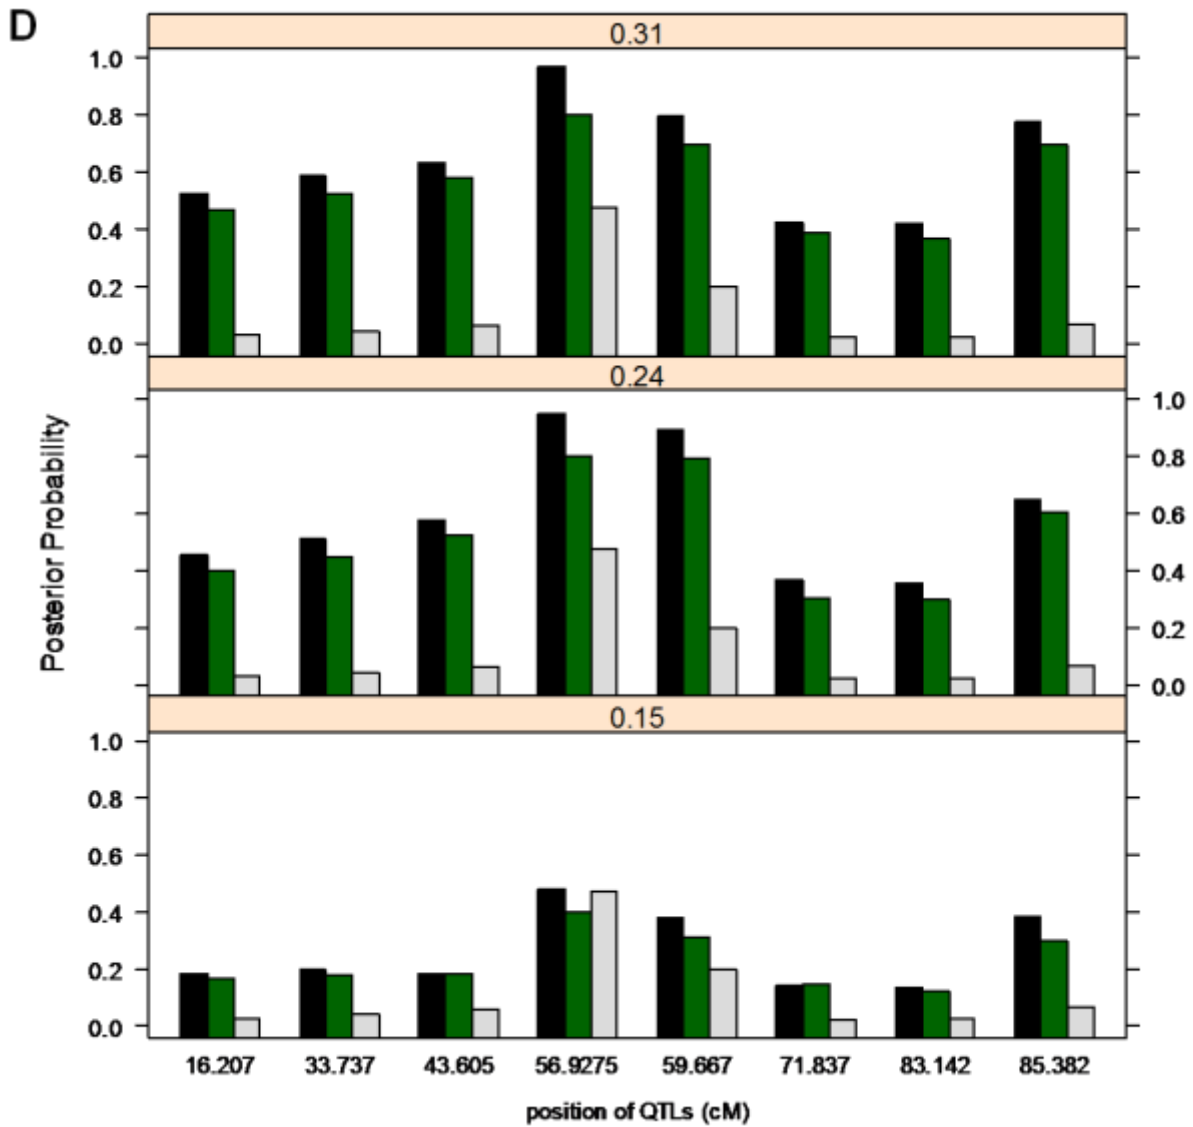

1

2 FIGURE S5. Bar plots of posterior probabilities of association of either or both of two bracketing SNP to each of the six largest  
 3 QTL effects within each of the first four replicates (A,B,C,D) at the highest ( $r^2=0.31$ ), medium ( $r^2=0.24$ ) and lowest ( $r^2=0.15$ )  
 4 average LD levels.. Posterior probabilities using BayesB and ante-BayesB are represented by green and black bars, respectively,  
 5 whereas gray bars represent the proportion of the genetic variance accounted for by the corresponding QTL. QTL location is  
 6 labeled on x-axis for each replicate.

7

8

9

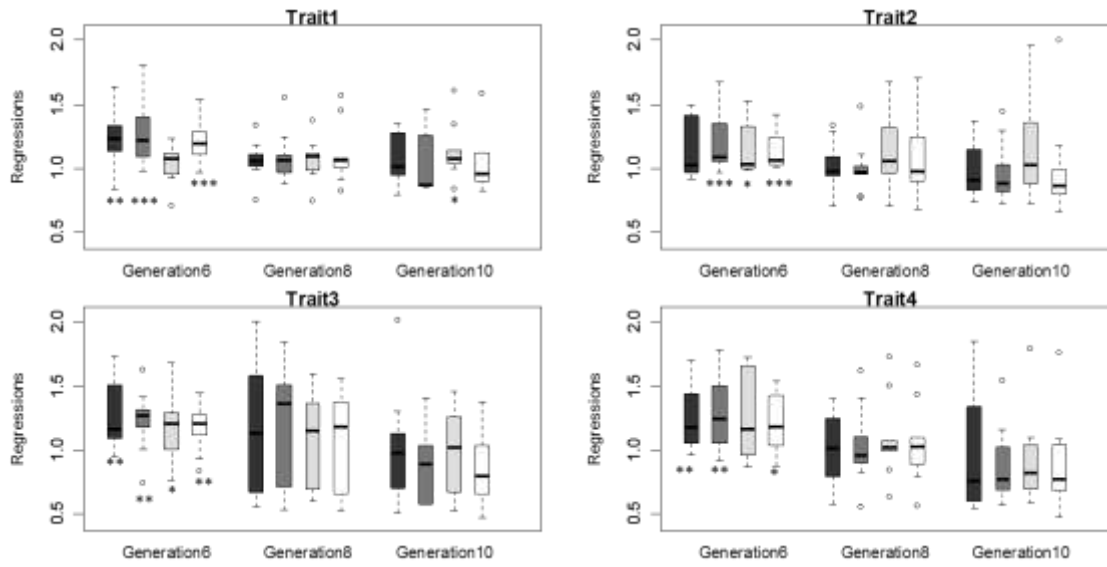

1

2 FIGURE S6: Boxplots of estimated slopes for within-replicate regressions of true breeding values on estimated  
 3 breeding values across 9 replicates for four traits in Generations 6, 8 and 10 from benchmark data of Hickey and  
 4 Gorjanc (2011) using ante-BayesB (black), BayesB (dark gray), anteBayesA (light gray) and BayesA (white).  
 5 Differences from unity indicated as significant by  $^*(0.05 < P < .10)$ ,  $^{**}(0.01 < P < .05)$  or  $^{***}(P < .01)$ .

6

7

8

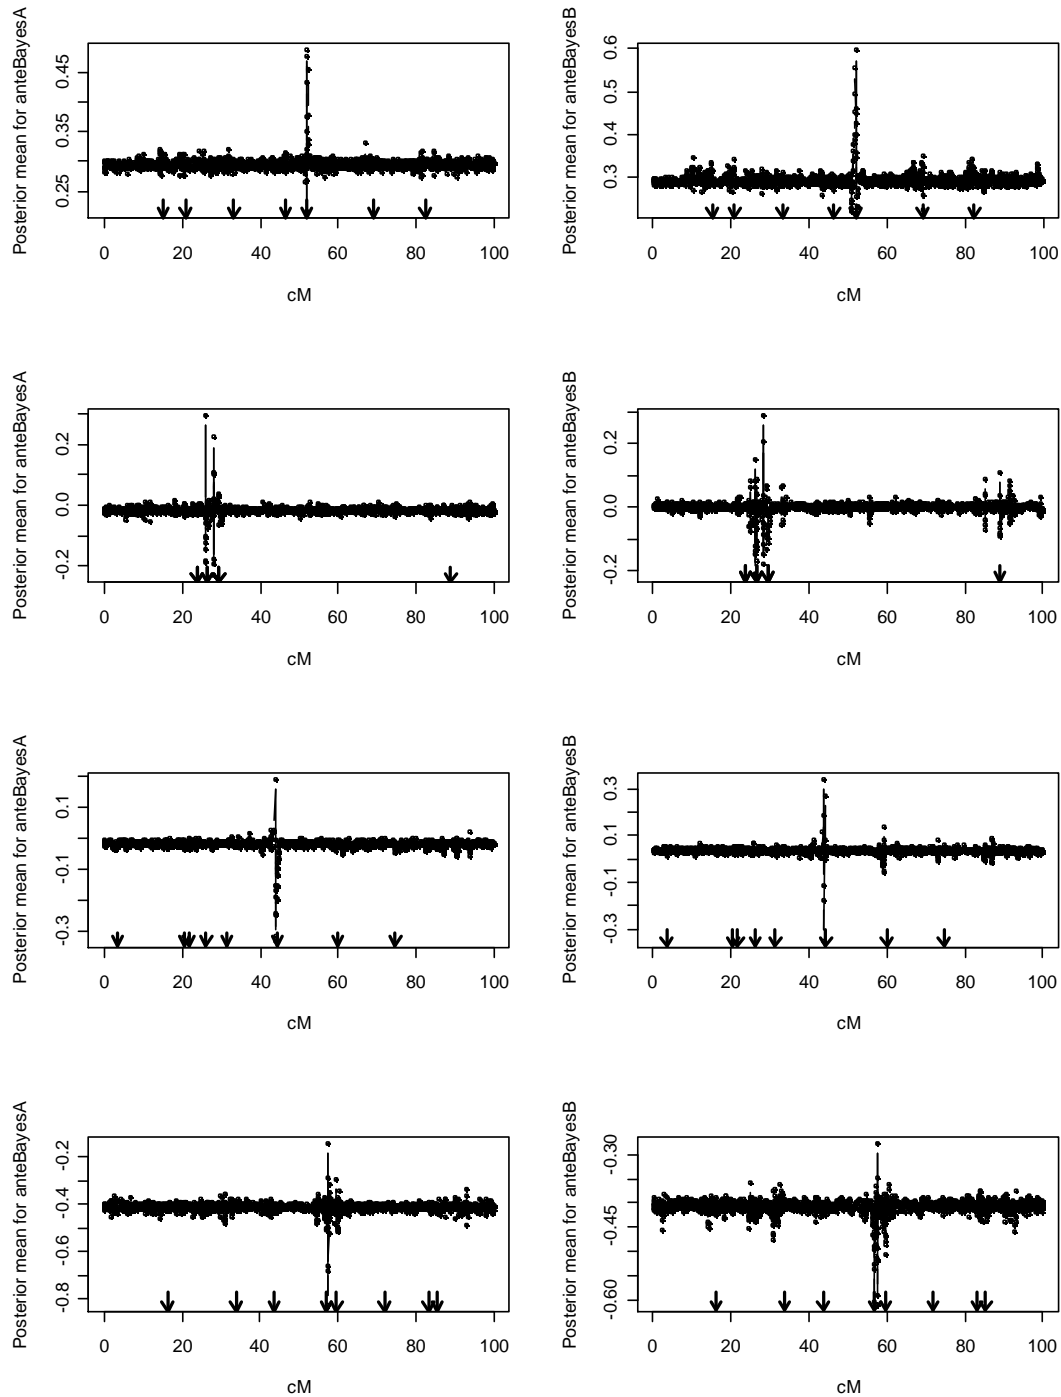

1

2

FIGURE S7. Posterior means of antedependence parameters  $\{t_{j,j-1}\}_{j=2}^m$  versus corresponding SNP bracket location based on

3

anteBayesA (left column) and anteBayesB (right column) for each of the first four replicates (rows 1 through 4) based on

4

analyses using highest average marker density ( $r^2 = 0.31$ ) Arrows denote the position for any QTL that accounted for greater

5

than 2% of the total variance in each replicate.

6

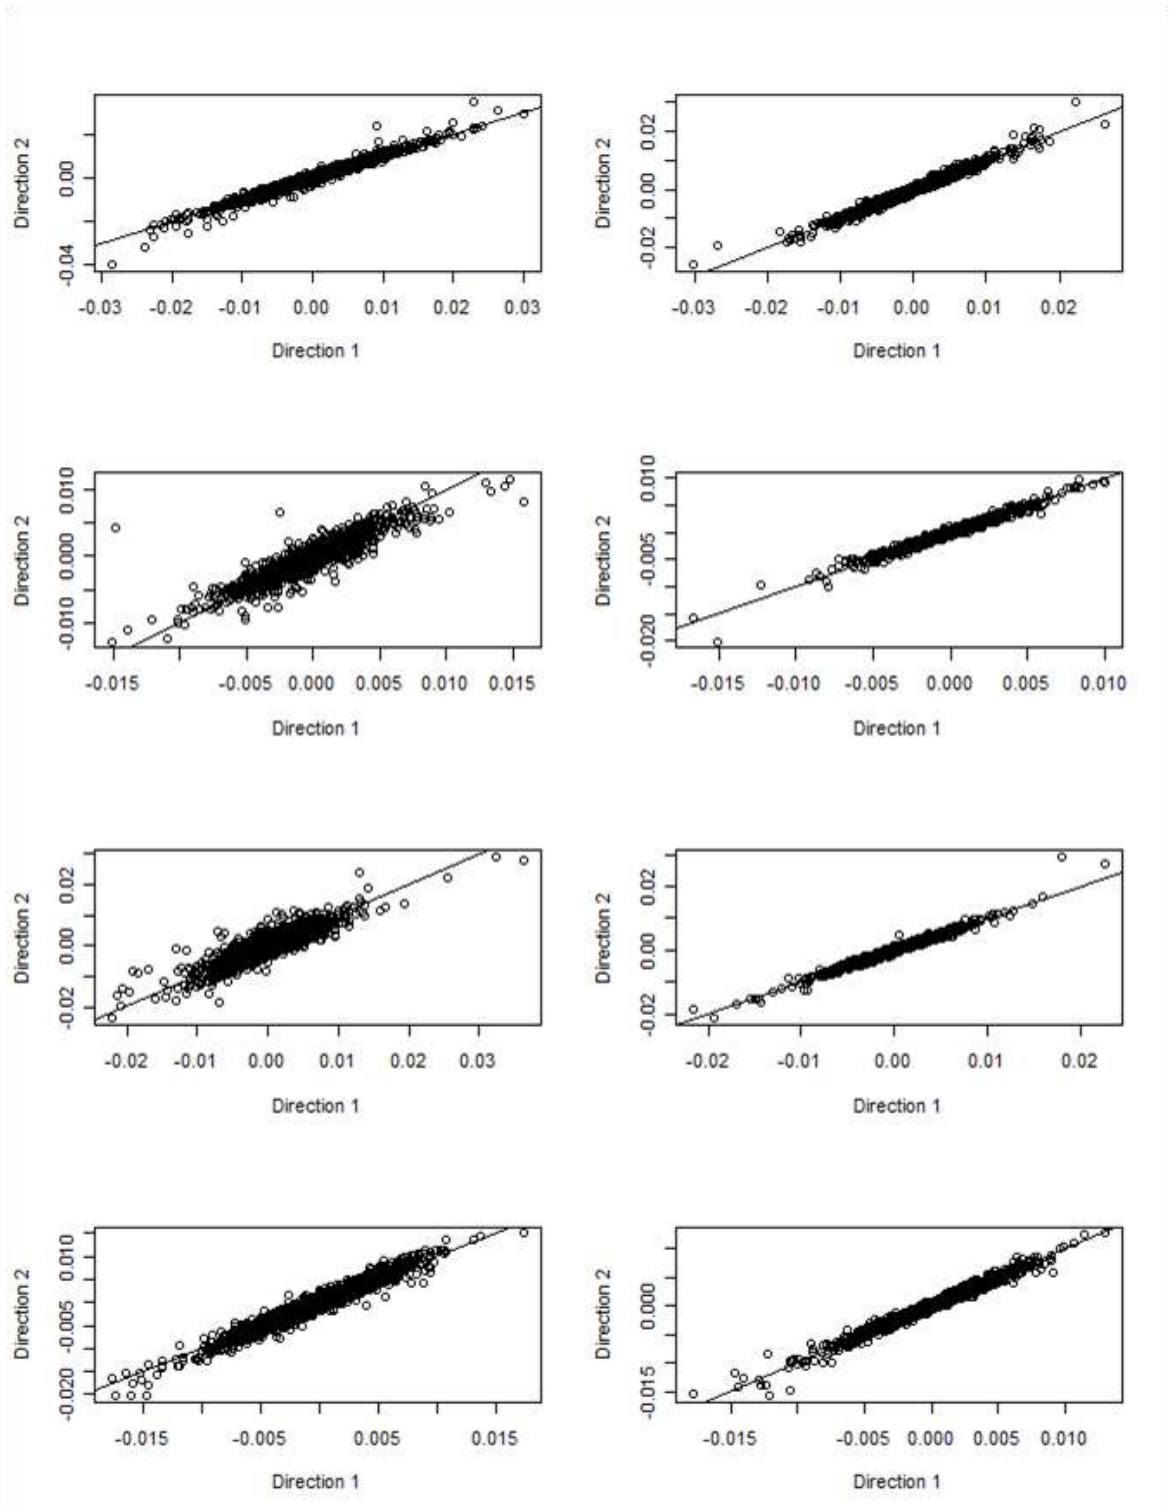

1

2

FIGURE S8. Posterior means of  $g$  using ante-BayesA (left-column) and ante-BayesB (right-column) based on specifying antedependence in one direction along the chromosome against corresponding posterior means based on the same analyses but specifying antedependence in the opposite direction for each of the first four replicates (rows 1 through 4) and the highest average marker density ( $r^2 = 0.31$ ). Reference lines of intercept 0 and slope 1 are superimposed.

6

1

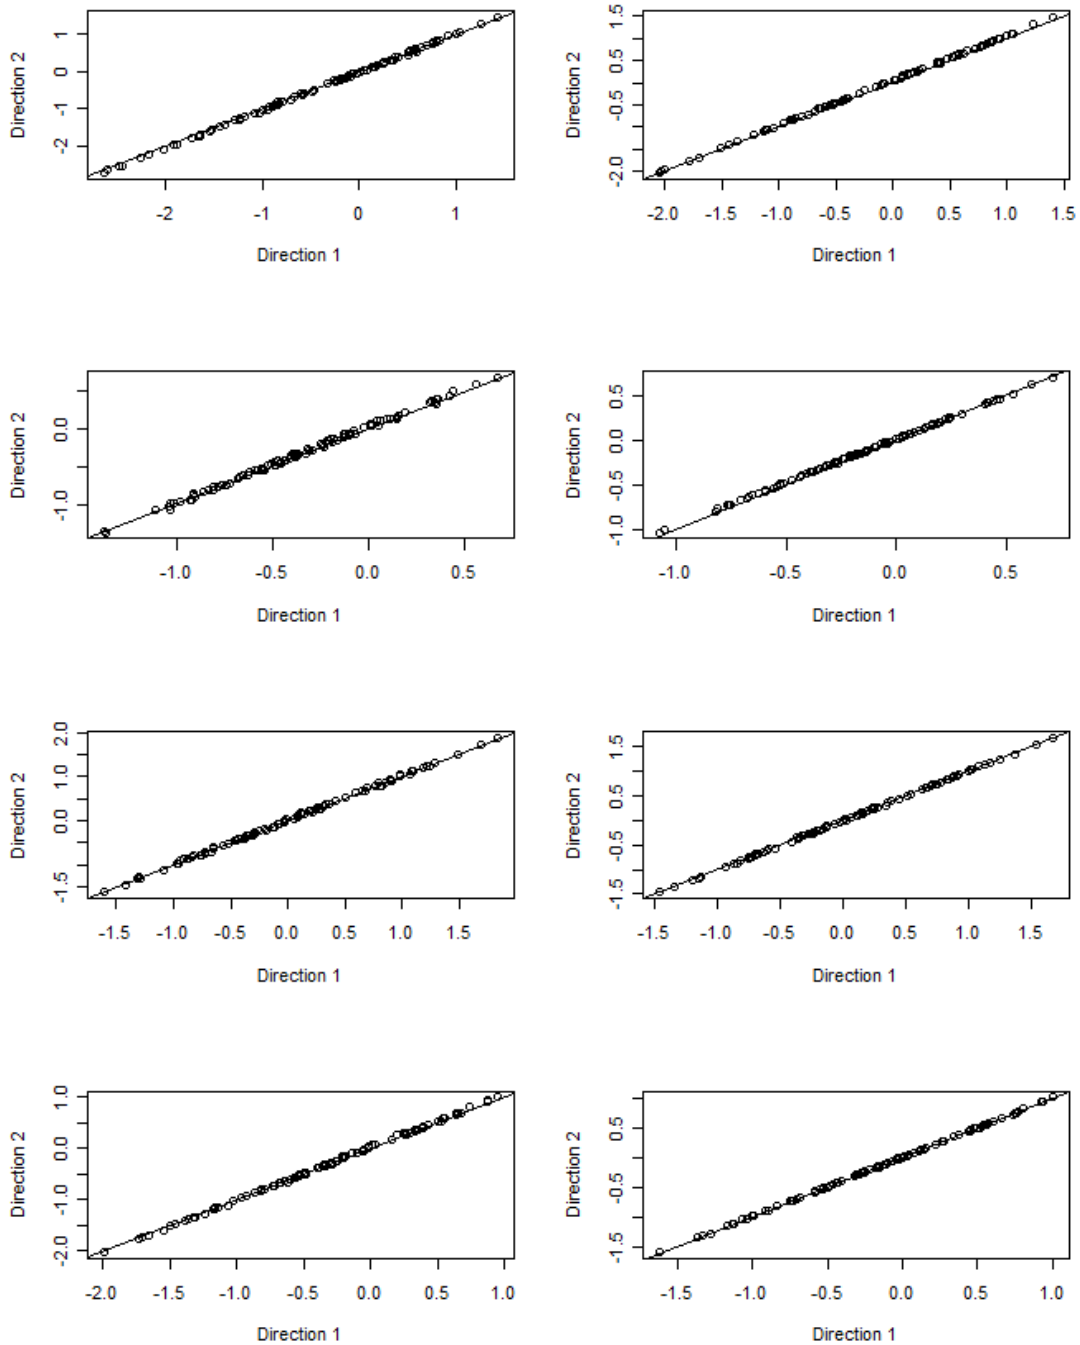

2

3

4

5

6

FIGURE S9. Posterior means of EBV using ante-BayesA (left-column) and ante-BayesB (right-column) based on specifying antedependence in one direction along the chromosome against corresponding posterior means based on the same analyses but specifying antedependence in the opposite direction for each of the first four replicates (rows 1 through 4) and the highest average marker density ( $r^2 = 0.31$ ). Reference lines of intercept 0 and slope 1 are superimposed.



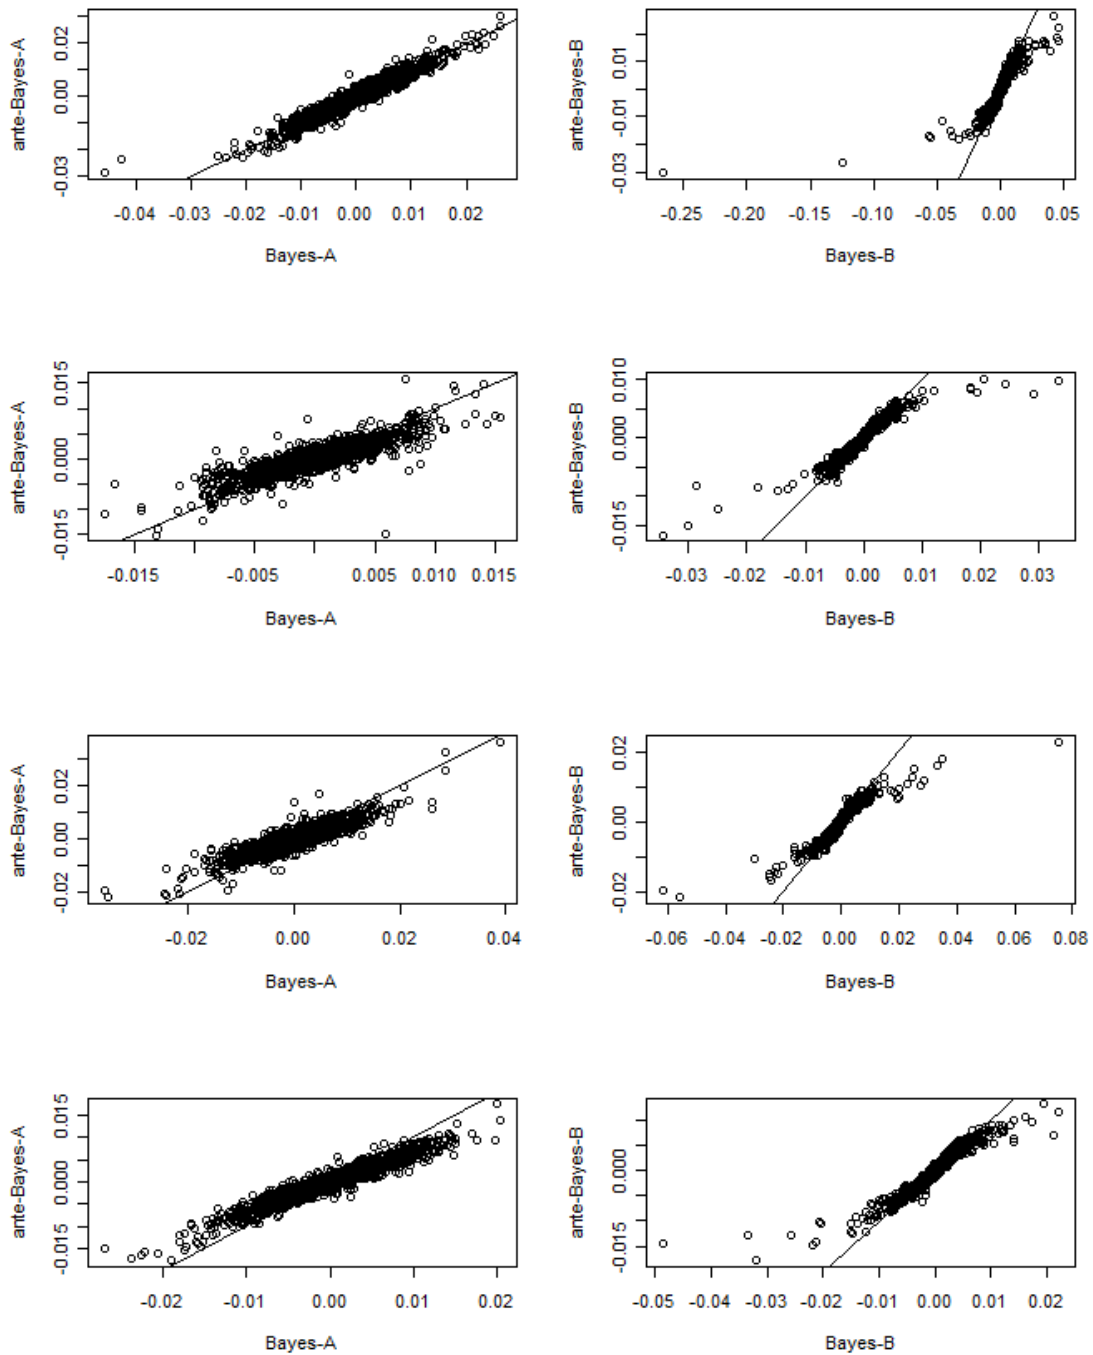

1

2 FIGURE S10. Posterior means of  $g$  based on ante-BayesA versus BayesA (left-column) and ante-BayesB versus BayesB (right-

3 column) for each of the first four replicates (rows 1 through 4) and the highest marker density ( $r^2 = 0.31$ ). Reference lines of

4 intercept 0 and slope 1 are superimposed.

1  
2  
3  
4  
5  
  
6  
7  
8  
9  
10  
11

TABLE S1

Average posterior means (PMEAN), posterior standard deviations (PSD), posterior medians (PMED), and effective sample size (ESS) for residual variance ( $\sigma_e^2$ ), cage variance ( $\sigma_c^2$ ), polygenic variance ( $\sigma_u^2$ ) and key hyperparameters ( $V_g$ ,  $S_g^2$ , and  $\pi_g$ ) based on BayesA and BayesB analyses of training data subsets derived from 10 different partitions of the heterogeneous stock mice dataset. Empirical standard deviations across the 10 partitions are provided in parentheses.

| Parameter    | PMEAN          | PSD            | PMED           | ESS         |
|--------------|----------------|----------------|----------------|-------------|
| BayesA       |                |                |                |             |
| $\sigma_e^2$ | 0.32(0.05)     | 0.15(0.003)    | 0.31(0.05)     | 6126(283)   |
| $\sigma_c^2$ | 2.08(0.13)     | 0.31(0.014)    | 2.05(0.12)     | 6048(247)   |
| $\sigma_u^2$ | 3.21(0.15)     | 0.49(0.018)    | 3.18(0.13)     | 5728(213)   |
| $V_g$        | 16.12(1.83)    | 23.11(2.72)    | 7.62(0.56)     | 285(20)     |
| $S_g^2$      | 0.002(0.00014) | 0.0007(0.0001) | 0.002(0.00014) | 266(17)     |
| BayesB       |                |                |                |             |
| $\sigma_e^2$ | 0.34(0.04)     | 0.13(0.002)    | 0.34(0.04)     | 12745(1213) |
| $\sigma_c^2$ | 2.03(0.12)     | 0.35(0.011)    | 2.04(0.13)     | 11642(1086) |
| $\sigma_u^2$ | 3.25(0.17)     | 0.53(0.021)    | 3.25(0.16)     | 9892(924)   |
| $V_g$        | 19.31(1.03)    | 24.14(1.09)    | 9.47(0.68)     | 536(65)     |
| $S_g^2$      | 0.02(0.003)    | 0.0006(0.003)  | 0.02(0.0004)   | 493(48)     |
| $\pi_g$      | 0.81(0.03)     | 0.01(0.004)    | 0.81(0.03)     | 517(61)     |

1  
2  
3  
4  
5  
6

TABLE S2

Average posterior means (PMEAN), posterior standard deviations (PSD), posterior medians (PMED), and effective sample size (ESS) for residual variance ( $\sigma_e^2$ ), cage variance ( $\sigma_c^2$ ), polygenic variance ( $\sigma_u^2$ ) and key hyperparameters ( $V_\delta$ ,  $s_\delta^2$ ,  $\pi_\delta$ ,  $\mu_t$  and  $\sigma_t^2$ ) based on ante-BayesA and ante-BayesB analyses of training data subsets derived from 10 different partitions of the heterogeneous stock mice dataset. Empirical standard deviations across the 10 partitions are provided in parentheses.

| Parameter    | PMEAN         | PSD             | PMED          | ESS       |
|--------------|---------------|-----------------|---------------|-----------|
| Ante-BayesA  |               |                 |               |           |
| $\sigma_e^2$ | 0.32(0.04)    | 0.14(0.002)     | 0.32(0.03)    | 2517(134) |
| $\sigma_c^2$ | 2.01(0.13)    | 0.34(0.012)     | 2.02(0.13)    | 2483(128) |
| $\sigma_u^2$ | 3.22(0.14)    | 0.53(0.03)      | 3.21(0.14)    | 2357(122) |
| $V_\delta$   | 15.54(1.32)   | 21.23(1.54)     | 7.27(0.46)    | 185(26)   |
| $s_\delta^2$ | 0.001(0.0004) | 0.0006(0.00005) | 0.001(0.0004) | 144(20)   |
| $\mu_t$      | 0.030(0.002)  | 0.0139(0.004)   | 0.030(0.001)  | 2561(52)  |
| $\sigma_t^2$ | 0.037(0.004)  | 0.010(0.0003)   | 0.034(0.004)  | 986(43)   |
| Ante-BayesB  |               |                 |               |           |
| $\sigma_e^2$ | 0.34(0.04)    | 0.15(0.004)     | 0.33(0.04)    | 9512(765) |
| $\sigma_c^2$ | 2.02(0.12)    | 0.39(0.017)     | 2.01(0.10)    | 9134(726) |
| $\sigma_u^2$ | 3.23(0.15)    | 0.52(0.03)      | 3.22(0.14)    | 9038(689) |
| $V_\delta$   | 18.21(1.04)   | 22.46(1.22)     | 9.26(0.74)    | 376(33)   |
| $s_\delta^2$ | 0.14(0.05)    | 0.32(0.18)      | 0.07(0.15)    | 259(21)   |
| $\pi_\delta$ | 0.80(0.04)    | 0.01(0.004)     | 0.79(0.03)    | 343(32)   |
| $\mu_t$      | 0.02(0.003)   | 0.011(0.002)    | 0.02(0.004)   | 1480(49)  |
| $\sigma_t^2$ | 0.032(3e-3)   | 0.05(2e-4)      | 0.031(3e-3)   | 638(41)   |

7

TABLE S3

Average posterior means for residual variance ( $\sigma_e^2$ ), polygenic variance ( $\sigma_u^2$ ), key hyperparameters ( $V_g, S_g^2$ , and  $\pi_g$ ) based on BayesA and BayesB analyses and key hyperparameters ( $V_\delta, S_\delta^2, \pi_\delta, \mu_t$  and  $\sigma_t^2$ ) based on ante-BayesB and ante-BayesA analyses for 4 different traits using Hickey and Gorjanc (2011) benchmark data. Empirical standard deviations across 9 replicates are provided in parentheses.

|                   | Trait 1          | Trait 2          | Trait 3          | Trait 4          |
|-------------------|------------------|------------------|------------------|------------------|
| <b>anteBayesB</b> |                  |                  |                  |                  |
| $\sigma_e^2$      | 0.834(0.019)     | 1.348(0.125)     | 0.593(0.015)     | 0.939(0.038)     |
| $\sigma_u^2$      | 0.131(0.017)     | 0.161(0.033)     | 0.101(0.010)     | 0.144(0.020)     |
| $V_\delta$        | 28.043(1.841)    | 15.707(2.430)    | 22.941(2.158)    | 17.792(2.953)    |
| $S_\delta^2$      | 7.13e-4(4.63e-5) | 1.34e-3(1.74e-4) | 4.40e-4(5.30e-5) | 9.14e-4(8.21e-5) |
| $\pi_\delta$      | 0.789(0.016)     | 0.834(0.015)     | 0.771(0.017)     | 0.826(0.019)     |
| $\mu_t$           | 0.032(0.011)     | 0.033(0.009)     | 0.011(0.015)     | 0.013(0.016)     |
| $\sigma_t^2$      | 0.038(0.002)     | 0.034(0.001)     | 0.031(0.006)     | 0.046(0.009)     |
| <b>BayesB</b>     |                  |                  |                  |                  |
| $\sigma_e^2$      | 0.833(0.020)     | 1.339(0.123)     | 0.591(0.015)     | 0.937(0.040)     |
| $\sigma_u^2$      | 0.108(0.017)     | 0.141(0.034)     | 0.085(0.010)     | 0.114(0.012)     |
| $V_g$             | 31.643(1.623)    | 23.475(3.750)    | 33.536(2.501)    | 27.203(3.674)    |
| $S_g^2$           | 8.23e-4(5.60e-5) | 1.97e-3(3.21e-4) | 5.31e-4(6.75e-5) | 4.91e-3(3.71e-3) |
| $\pi_g$           | 0.826(0.011)     | 0.861(0.015)     | 0.823(0.017)     | 0.871(0.020)     |
| <b>anteBayesA</b> |                  |                  |                  |                  |
| $\sigma_e^2$      | 0.827(0.020)     | 1.339(0.124)     | 0.590(0.015)     | 0.935(0.040)     |
| $\sigma_u^2$      | 0.157(0.030)     | 0.208(0.051)     | 0.143(0.018)     | 0.169(0.030)     |
| $V_\delta$        | 22.556(1.192)    | 12.501(2.840)    | 20.909(1.194)    | 14.941(3.003)    |
| $S_\delta^2$      | 6.40e-5(1.45e-5) | 6.84e-5(1.91e-5) | 2.22e-5(1.06e-5) | 4.85e-5(1.81e-5) |
| $\mu_t$           | 0.021(0.013)     | 0.007(0.020)     | 0.002(0.016)     | 0.021(0.025)     |
| $\sigma_t^2$      | 0.035(0.003)     | 0.022(0.005)     | 0.032(0.002)     | 0.027(0.004)     |
| <b>BayesA</b>     |                  |                  |                  |                  |
| $\sigma_e^2$      | 0.829(0.019)     | 1.338(0.124)     | 0.592(0.015)     | 0.939(0.040)     |
| $\sigma_u^2$      | 0.099(0.015)     | 0.123(0.034)     | 0.071(0.009)     | 0.097(0.012)     |
| $V_g$             | 23.871(2.033)    | 14.639(3.147)    | 23.032(2.832)    | 15.882(3.812)    |
| $S_g^2$           | 1.05e-4(8.70e-6) | 1.22e-4(1.68e-5) | 6.33e-5(7.23e-6) | 8.30e-5(1.61e-5) |

6

7

TABLE S4

Average effective sample size for residual variance ( $\sigma_e^2$ ), polygenic variance ( $\sigma_u^2$ ), key hyperparameters ( $V_g, S_g^2$ , and  $\pi_g$ ) based on BayesA and BayesB analyses and key hyperparameters ( $V_\delta, S_\delta^2, \pi_g, \mu_t$  and  $\sigma_t^2$ ) based on ante-BayesB and ante-BayesA analyses for 4 different traits using Hickey and Gorjanc (2011) benchmark data. Empirical standard deviations across 9 replicates are provided in parentheses.

|                   | Trait 1    | Trait 2    | Trait 3    | Trait 4    |
|-------------------|------------|------------|------------|------------|
| <b>anteBayesB</b> |            |            |            |            |
| $\sigma_e^2$      | 4910(879)  | 4883(757)  | 6139(1065) | 4163(599)  |
| $\sigma_u^2$      | 1423(317)  | 905(131)   | 1164(174)  | 961(177)   |
| $V_\delta$        | 136(12)    | 157(25)    | 125(10)    | 146(24)    |
| $S_\delta^2$      | 108(7)     | 111(9)     | 113(12)    | 121(19)    |
| $\pi_\delta$      | 216(19)    | 236(24)    | 210(20)    | 249(25)    |
| $\mu_t$           | 168(29)    | 184(35)    | 150(26)    | 132(27)    |
| $\sigma_t^2$      | 241(46)    | 302(63)    | 207(45)    | 225(53)    |
| <b>BayesB</b>     |            |            |            |            |
| $\sigma_e^2$      | 3058(541)  | 4814(1181) | 3462(555)  | 3354(344)  |
| $\sigma_u^2$      | 1056(238)  | 968(284)   | 993(154)   | 836(85)    |
| $V_g$             | 137(6)     | 162(18)    | 127(5)     | 128(13)    |
| $S_g^2$           | 138(4)     | 122(28)    | 119(16)    | 126(16)    |
| $\pi_g$           | 264(36)    | 347(41)    | 297(26)    | 275(39)    |
| <b>anteBayesA</b> |            |            |            |            |
| $\sigma_e^2$      | 4887(1131) | 6352(1900) | 9318(1823) | 5667(1638) |
| $\sigma_u^2$      | 426(64)    | 1429(1026) | 782(225)   | 810(321)   |
| $V_\delta$        | 105(4)     | 164(48)    | 101(8)     | 122(25)    |
| $S_\delta^2$      | 114(9)     | 120(34)    | 107(20)    | 118(24)    |
| $\mu_t$           | 137(10)    | 110(4)     | 101(18)    | 107(10)    |
| $\sigma_t^2$      | 191(25)    | 273(66)    | 201(25)    | 259(51)    |
| <b>BayesA</b>     |            |            |            |            |
| $\sigma_e^2$      | 2794(342)  | 4212(1053) | 2986(402)  | 2541(200)  |
| $\sigma_u^2$      | 677(93)    | 566(111)   | 642(77)    | 494(38)    |
| $V_g$             | 114(6)     | 211(69)    | 123(4)     | 229(65)    |
| $S_g^2$           | 150(14)    | 187(58)    | 145(11)    | 183(42)    |

6

7
